# Supplementary material for: Sulfinyl-aminotroponiminates: alkali- (Li, Na, K) and heavy-metal (Bi) complexes
Source: Royal Society of Chemistry journal article supplement (doi:10.1039/d2dt01802k), 2022-01-01
Supplement: d2dt01802k1.pdf [file d2dt01802k1.pdf]

Electronic Supplementary Information

for

**Sulfinyl-Aminotroponimines:**  
**Alkali- (Li, Na, K) and heavy-metal (Bi) complexes**

Anna Hanft,<sup>a</sup> Dennis Rottschäfer,<sup>b</sup> Pascal Weinberger,<sup>a</sup> Victoria Müller,<sup>a</sup> Krzysztof Radacki,<sup>a</sup>  
Xiulan Xie,<sup>b</sup> and Crispin Lichtenberg<sup>b,\*</sup>

*a: Institut für Anorganische Chemie, Julius-Maximilians-Universität Würzburg  
Am Hubland, 97074 Würzburg*

*b: Fachbereich Chemie, Philipps-Universität Marburg  
Hans-Meerwein-Str. 4, 35043 Marburg*

*\*E-Mail: [crispin.lichtenberg@chemie.uni-marburg.de](mailto:crispin.lichtenberg@chemie.uni-marburg.de)*

**Table of Contents**

|                                                        |           |
|--------------------------------------------------------|-----------|
| <b>Plots of NMR Spectra .....</b>                      | <b>2</b>  |
| <b>Single-Crystal X-Ray Diffraction Analysis .....</b> | <b>10</b> |
| <b>Electrochemical analyses .....</b>                  | <b>15</b> |
| <b>DOSY NMR Spectroscopic Studies .....</b>            | <b>18</b> |
| <b>DFT Calculations .....</b>                          | <b>20</b> |
| <b>References .....</b>                                | <b>29</b> |

## Plots of NMR Spectra

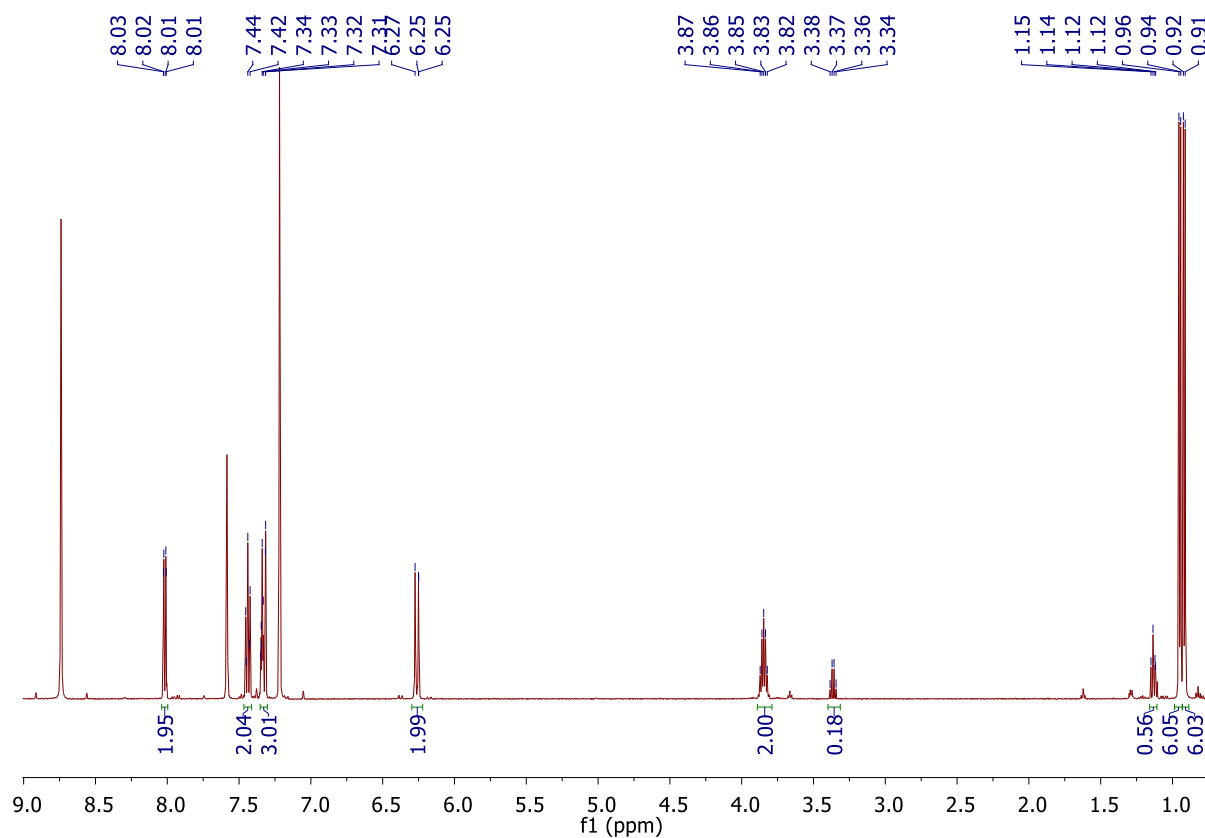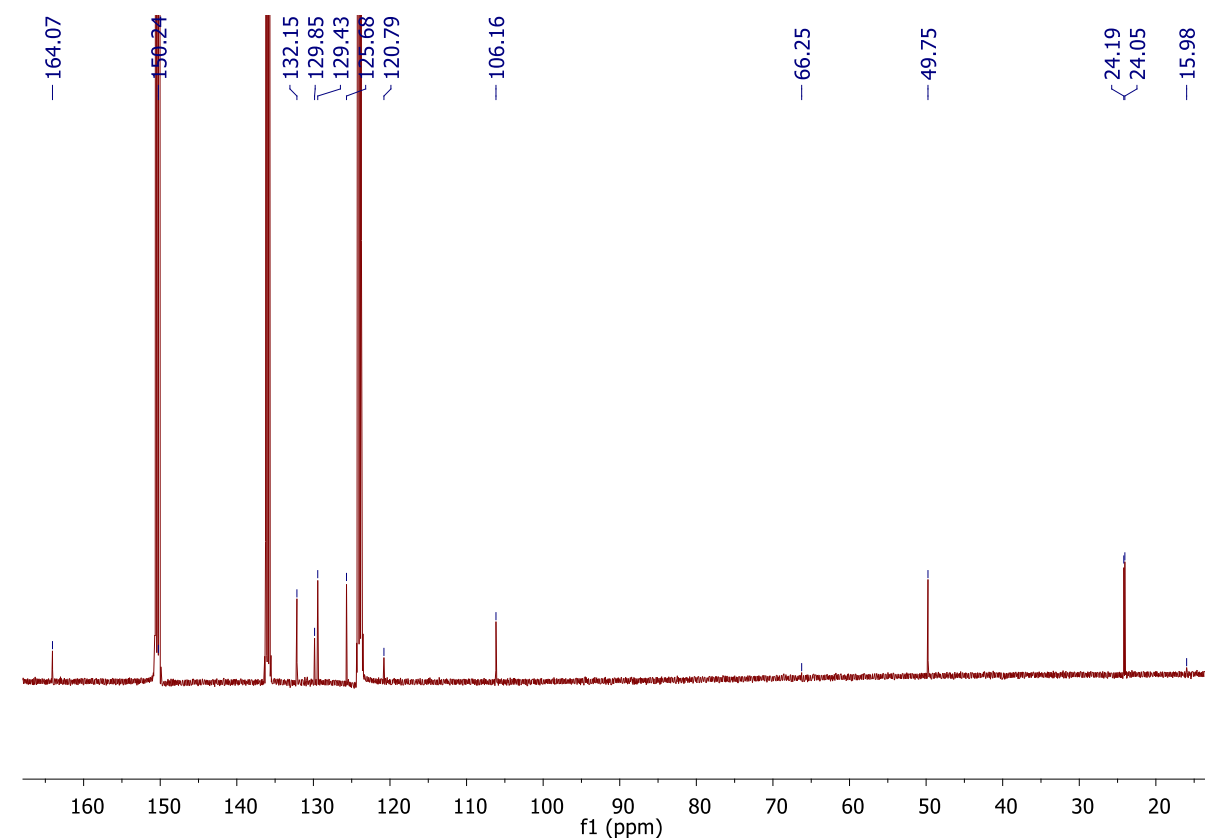

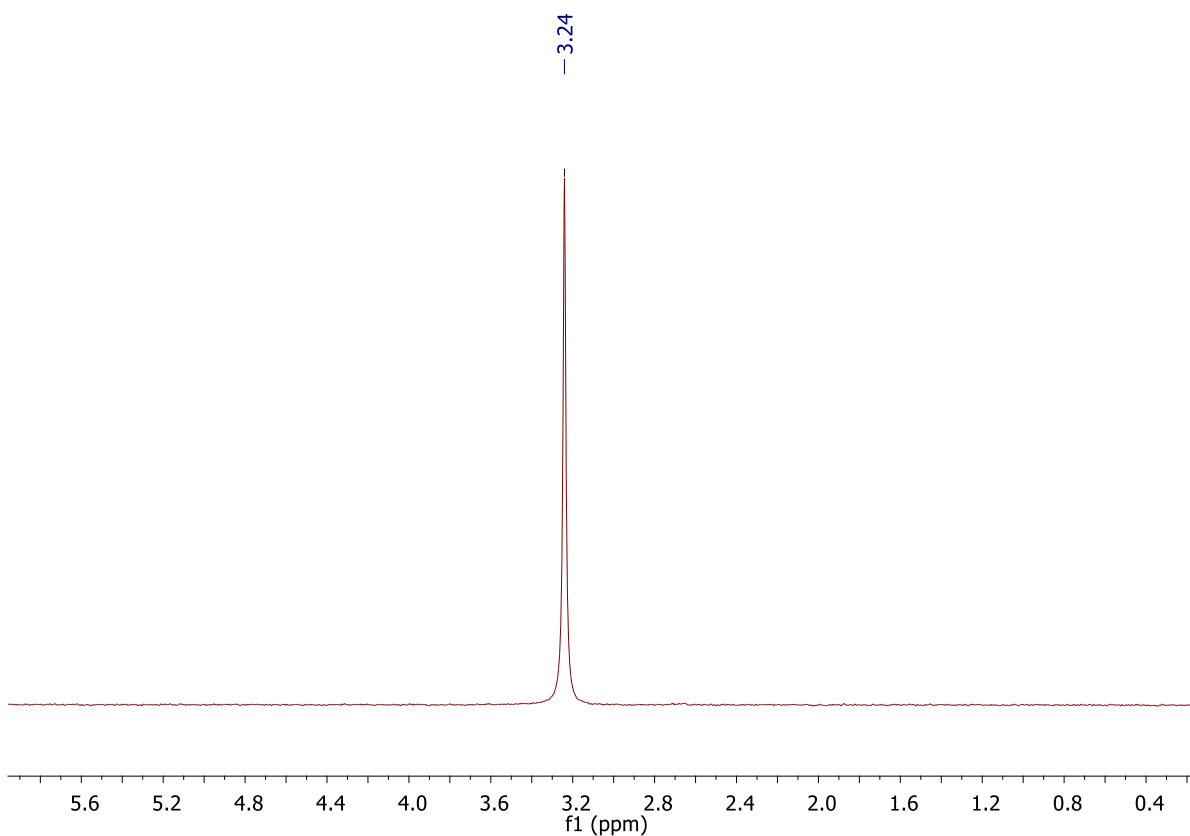

**Figure S3.**  $^7\text{Li}$  NMR spectrum (194 MHz, 298 K, pyridine- $d_5$ ) of compound **2-Li**.

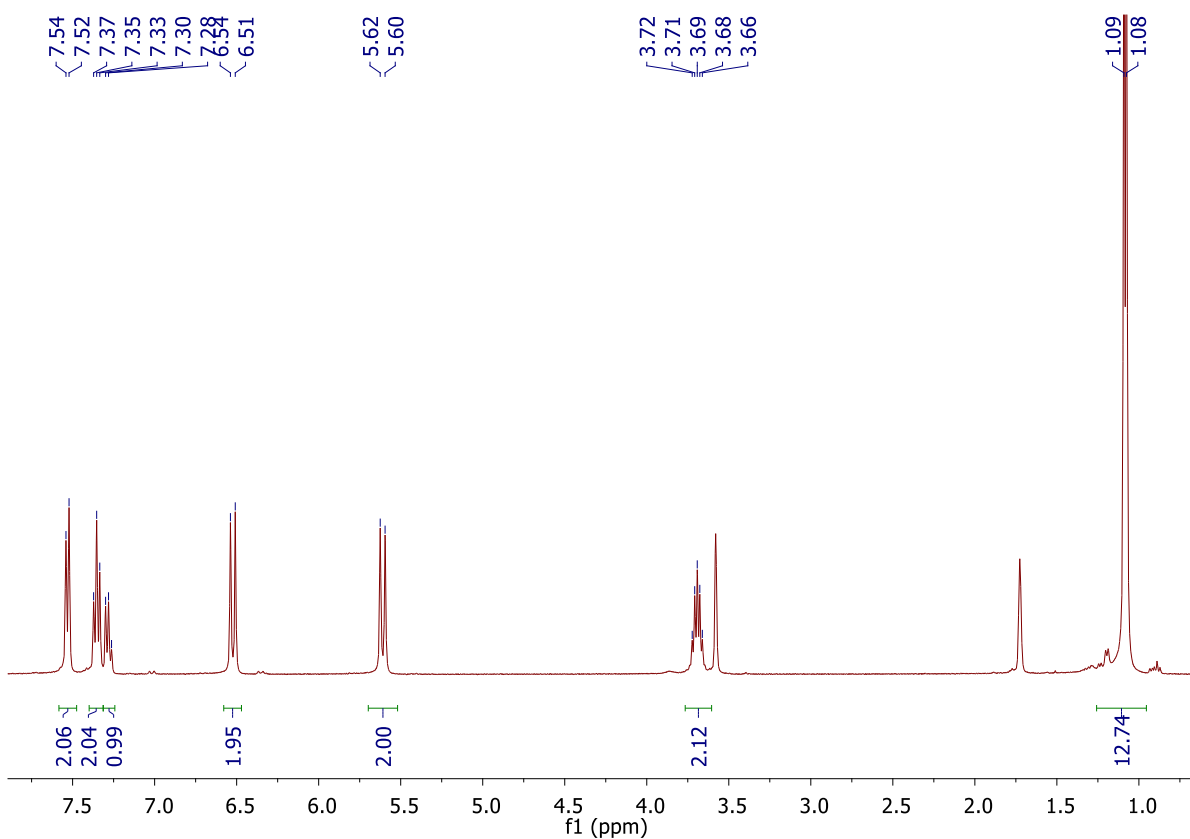

**Figure S4.**  $^1\text{H}$  NMR spectrum (400 MHz, 298 K, pyridine- $d_5$ ) of compound **2-Na**.

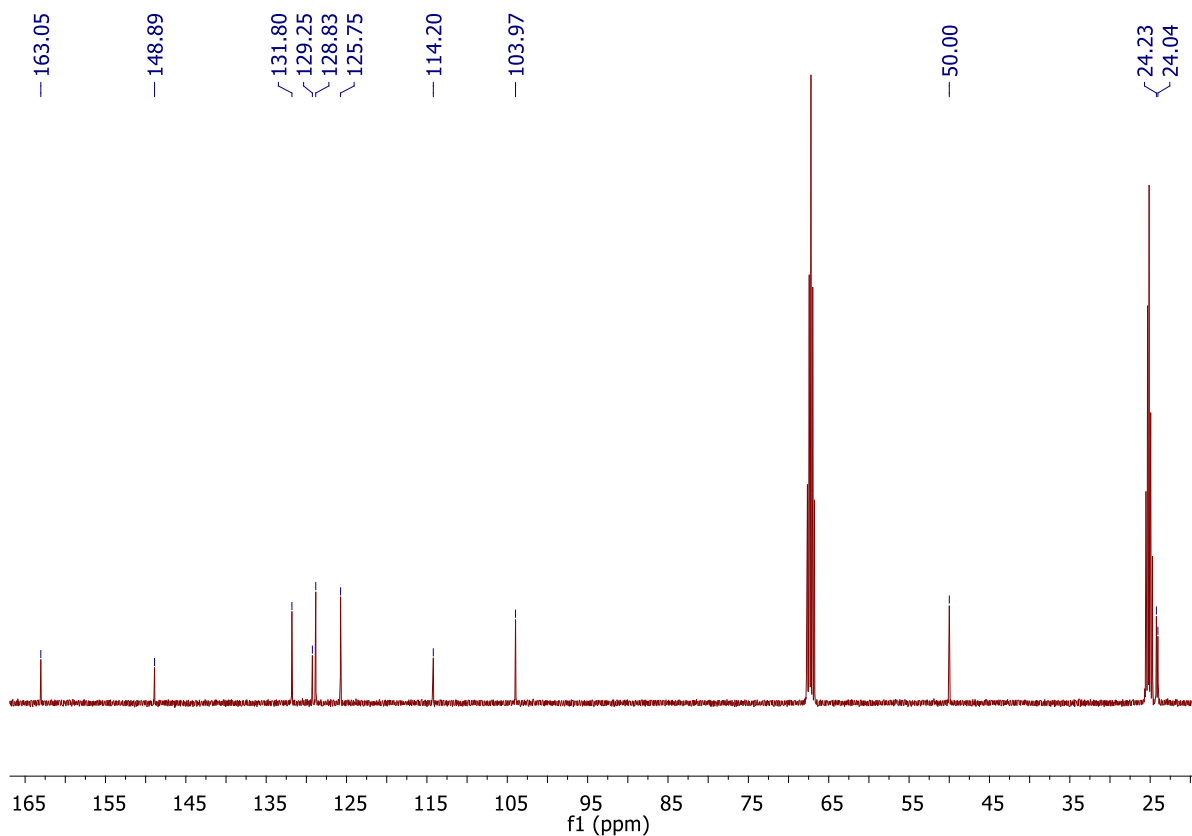

**Figure S5.**  $^{13}\text{C}\{^1\text{H}\}$  NMR spectrum (100 MHz, 298 K, pyridine- $d_5$ ) of compound **2-Na**.

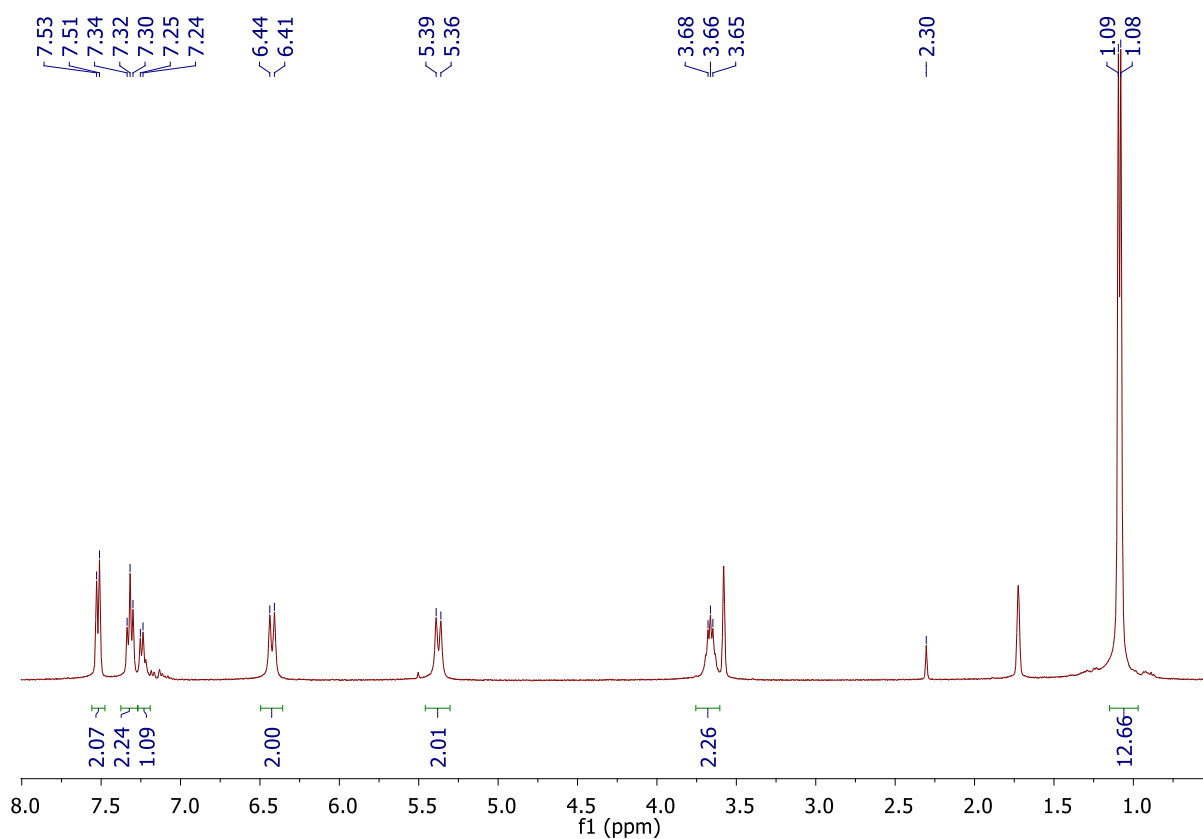

**Figure S6.**  $^1\text{H}$  NMR spectrum (400 MHz, 298 K, THF- $d_5$ ) of compound **2-K**.

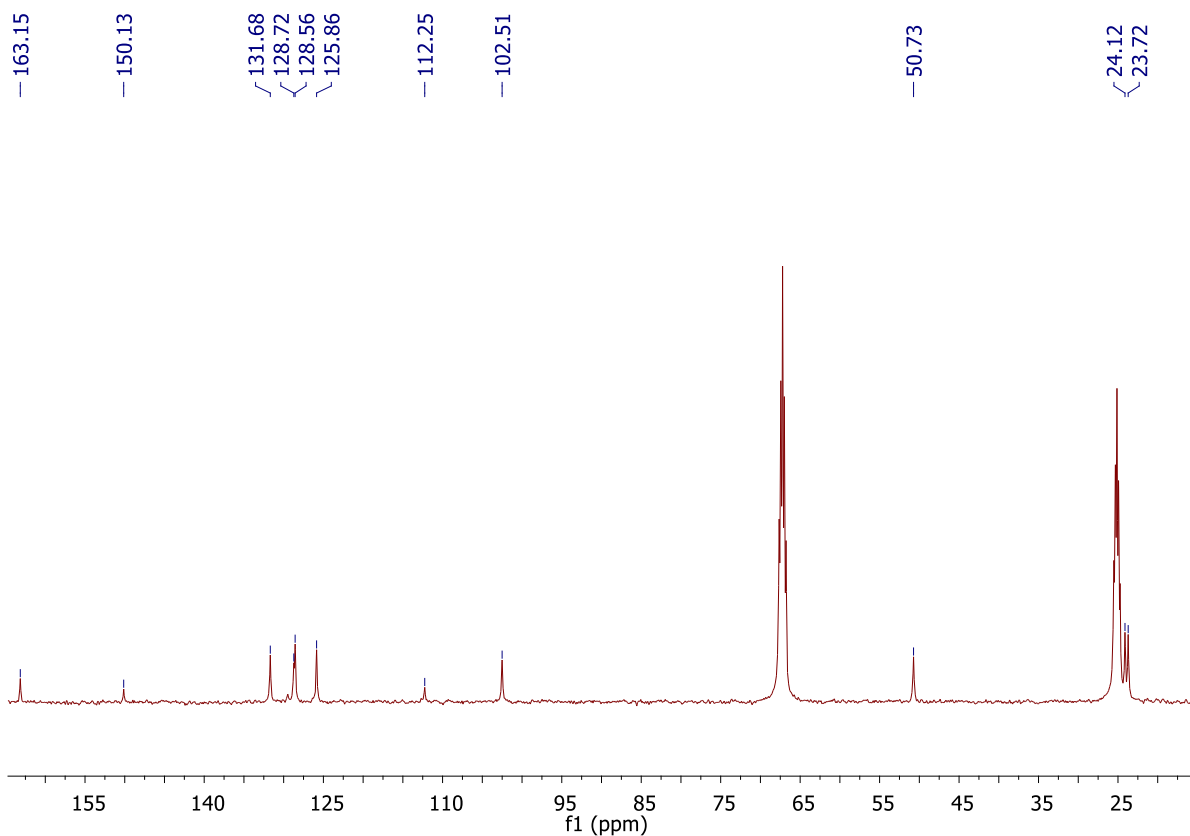

**Figure S7.**  $^{13}\text{C}\{^1\text{H}\}$  NMR spectrum (100 MHz, 298 K, THF- $d_5$ ) of compound **2-K**.

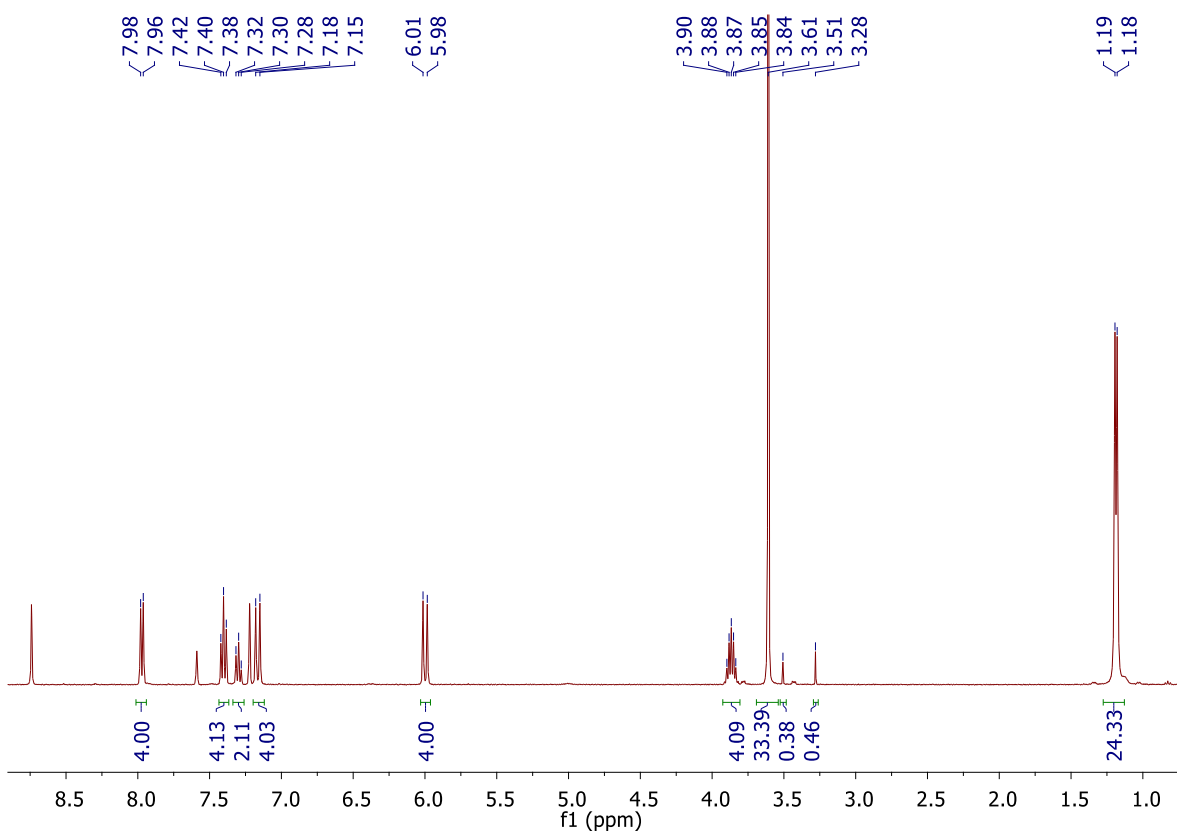

**Figure S8.**  $^1\text{H}$  NMR spectrum (400 MHz, 298 K, pyridine- $d_5$ ) of compound **3**.

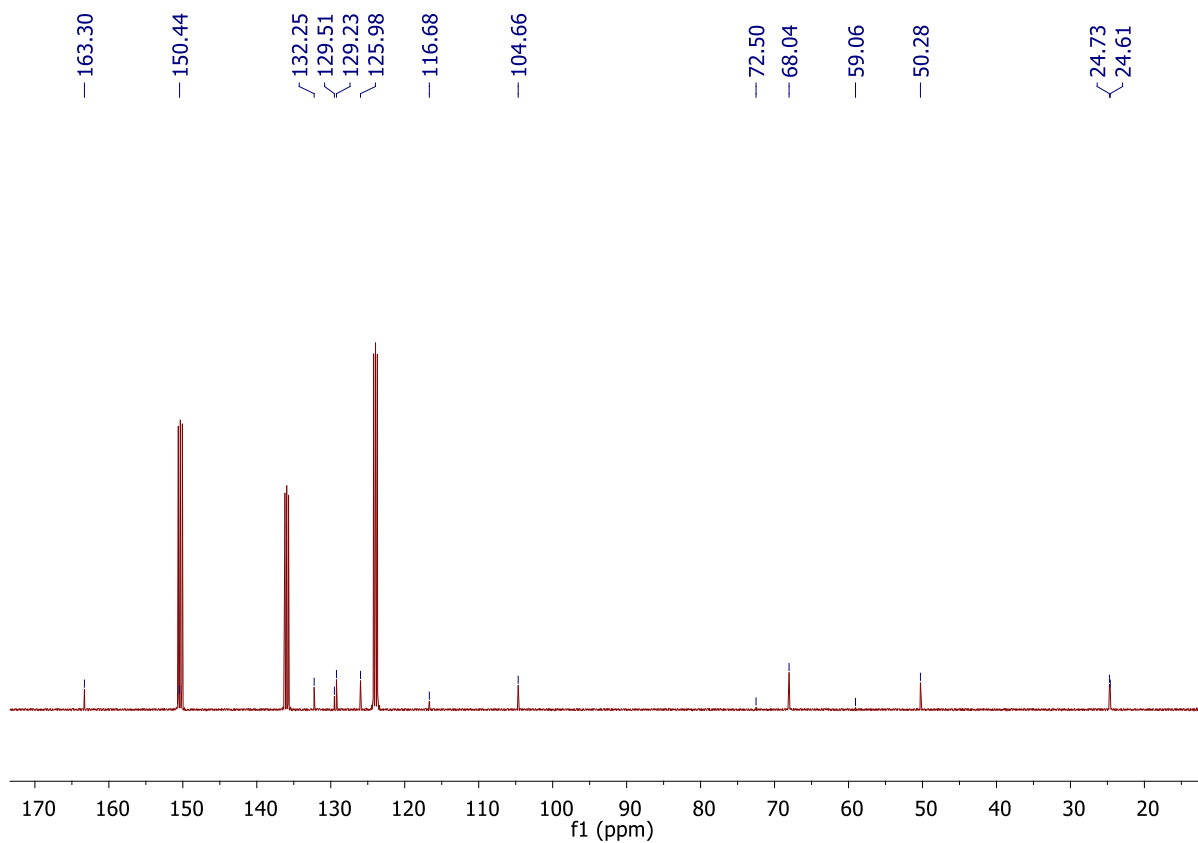

**Figure S9.**  $^{13}\text{C}\{^1\text{H}\}$  NMR spectrum (100 MHz, 298 K, pyridine- $d_5$ ) of compound **3**.

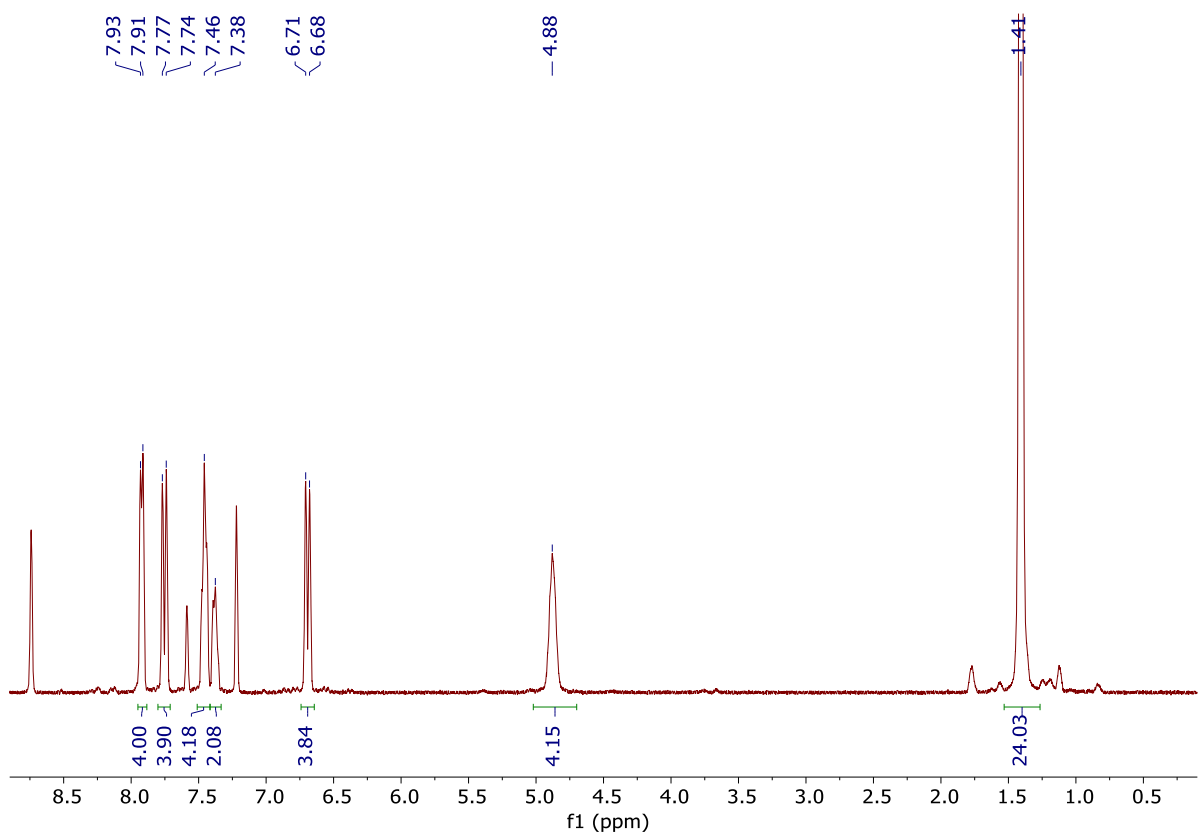

**Figure S10.**  $^1\text{H}$  NMR spectrum (400 MHz, 298 K, pyridine- $d_5$ ) of compound **5-Cl**.

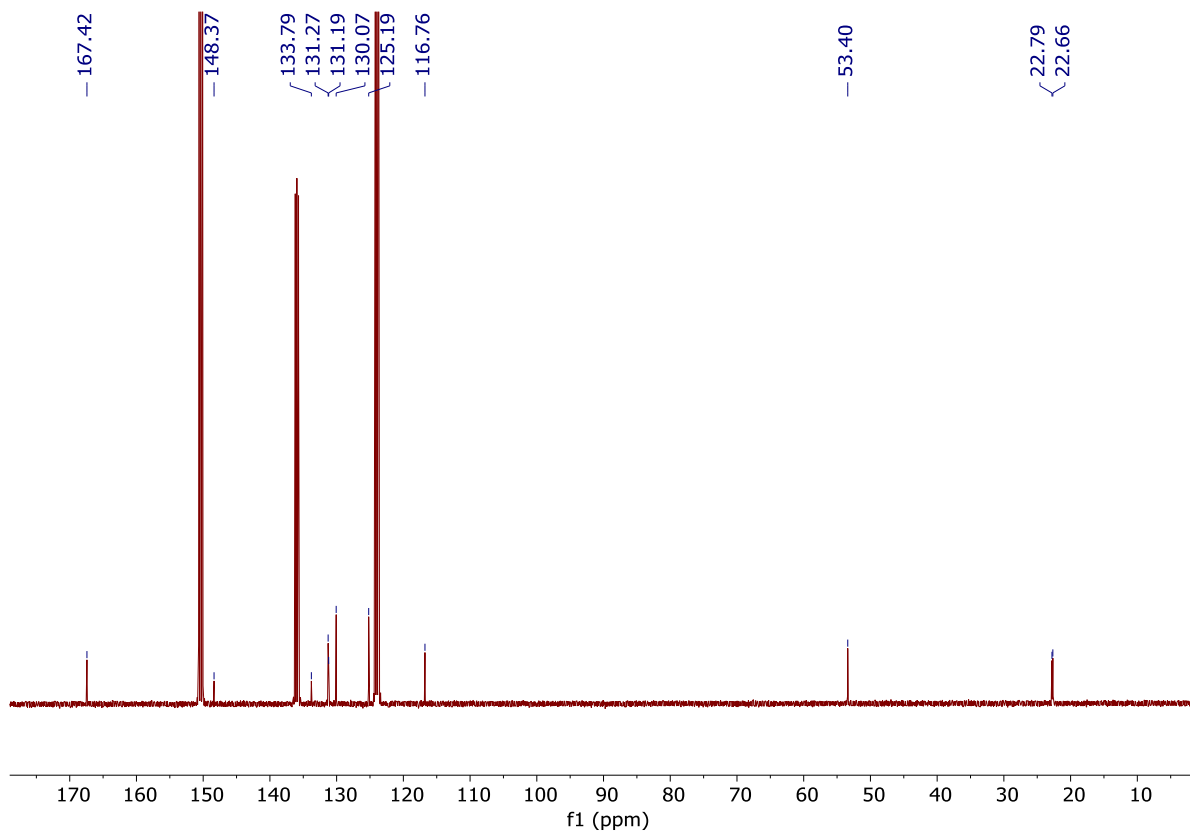

**Figure S11.**  $^{13}\text{C}\{^1\text{H}\}$  NMR spectrum (100 MHz, 298 K, pyridine- $d_5$ ) of compound **5-Cl**.

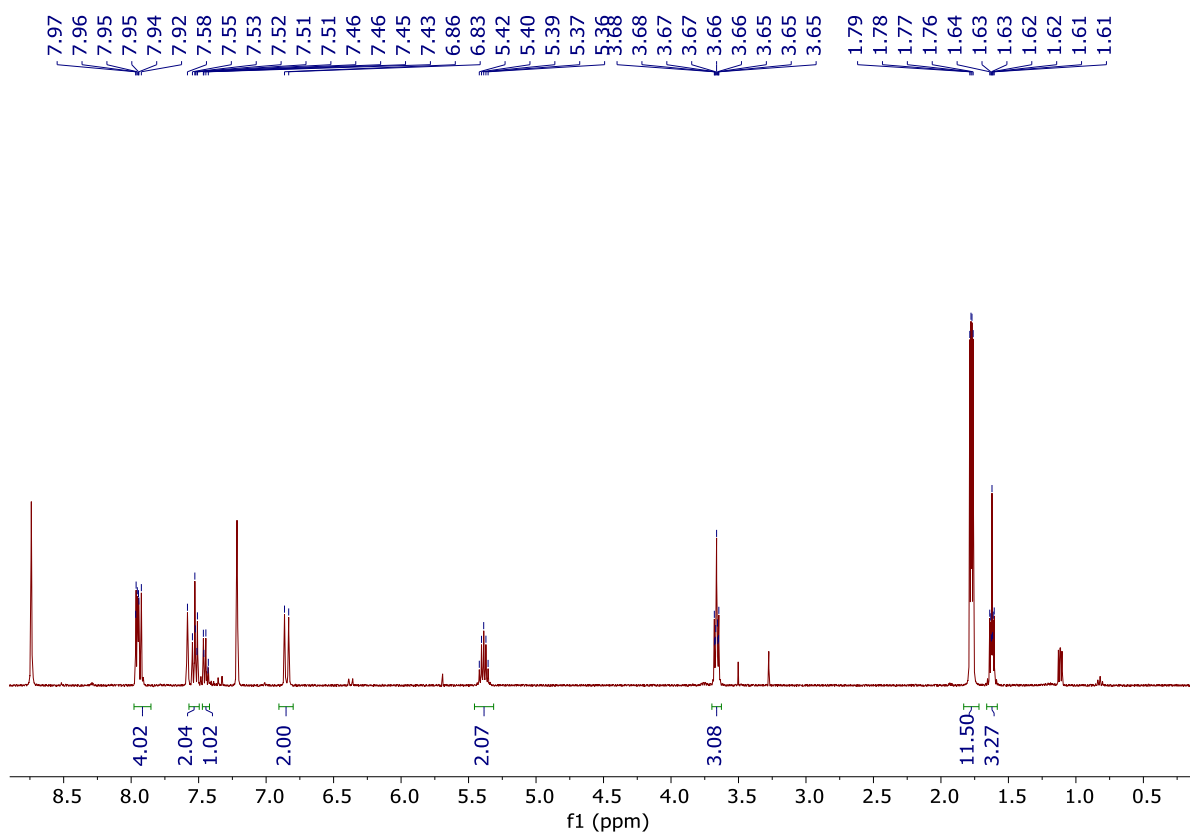

**Figure S12.**  $^1\text{H}$  NMR spectrum (400 MHz, 298 K, pyridine- $d_5$ ) of compound **6-Cl** (a crude product (prior to recrystallisation from pyridine/pentane) was analysed, revealing residual amounts of THF).

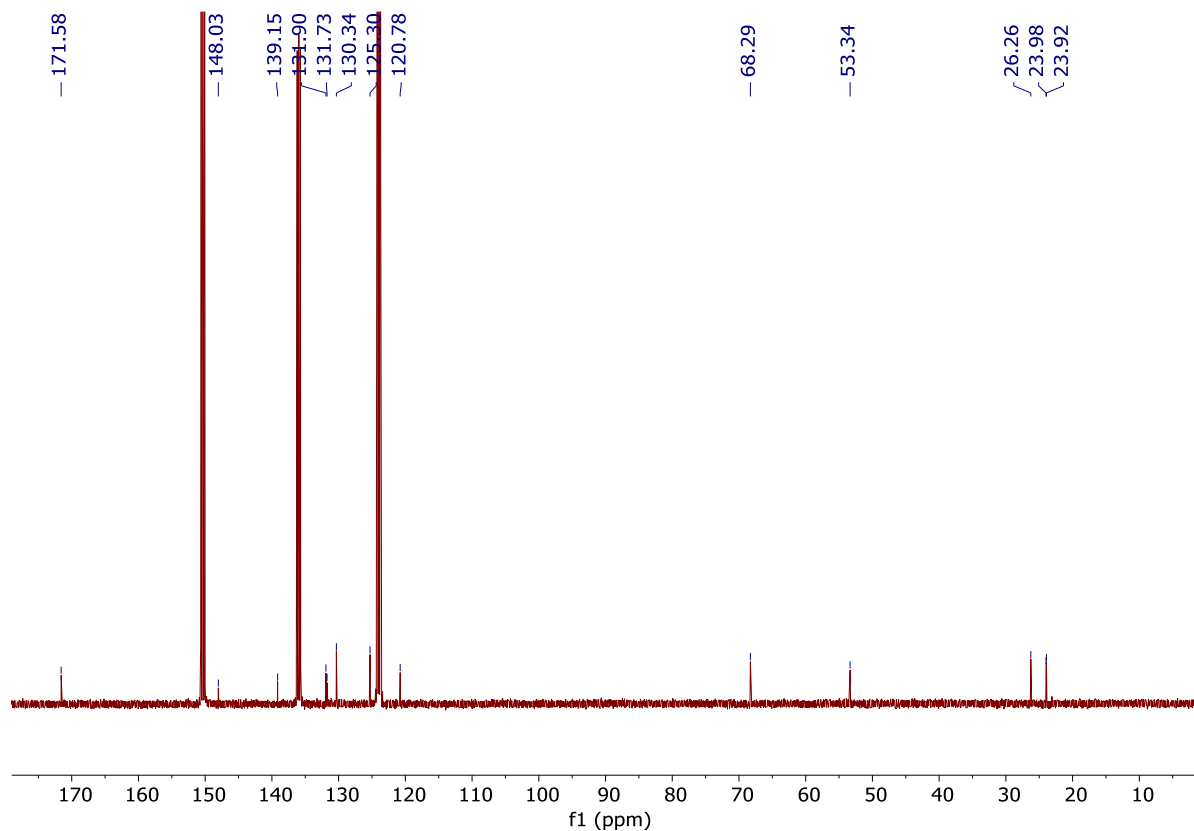

**Figure S13.**  $^{13}\text{C}\{^1\text{H}\}$  NMR spectrum (100 MHz, 298 K, pyridine- $d_5$ ) of compound **6-Cl** (a crude product (prior to recrystallisation from pyridine/pentane) was analysed, revealing residual amounts of THF).

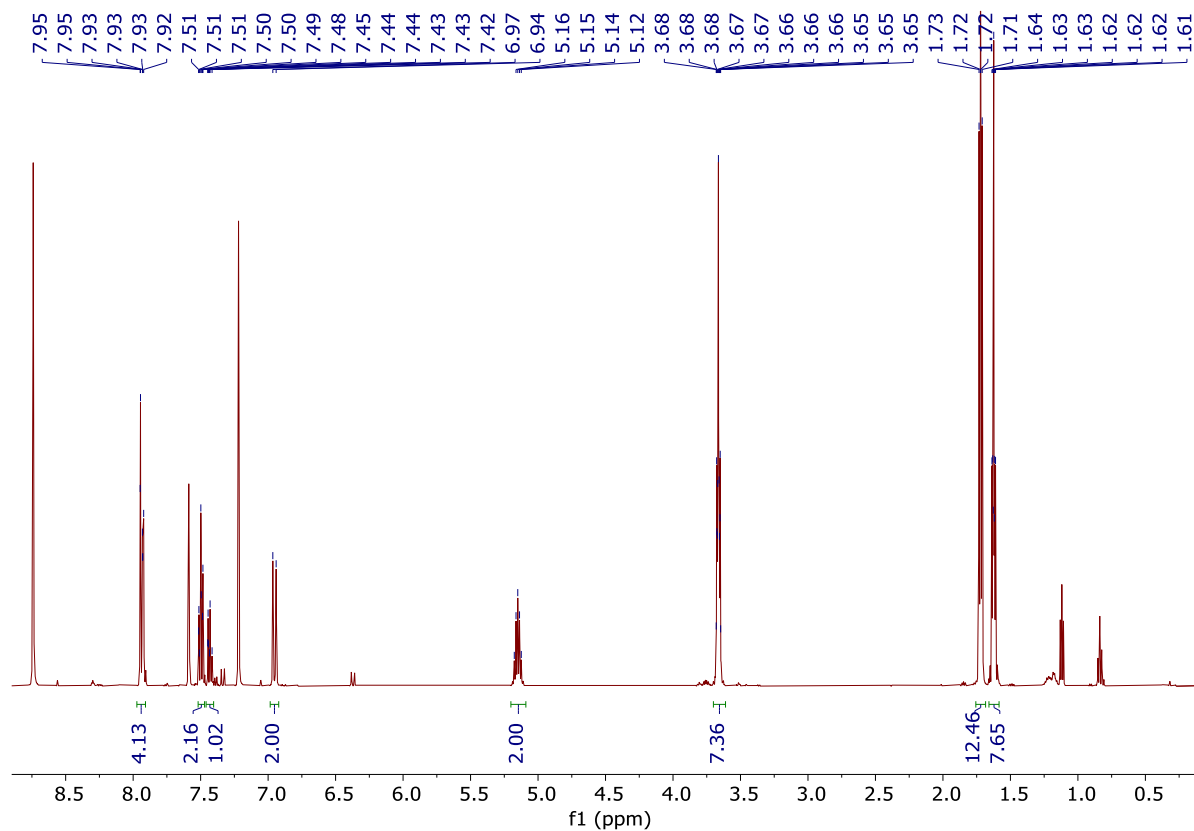

**Figure S14.**  $^1\text{H}$  NMR spectrum (400 MHz, 298 K, pyridine- $d_5$ ) of compound **6-I**.



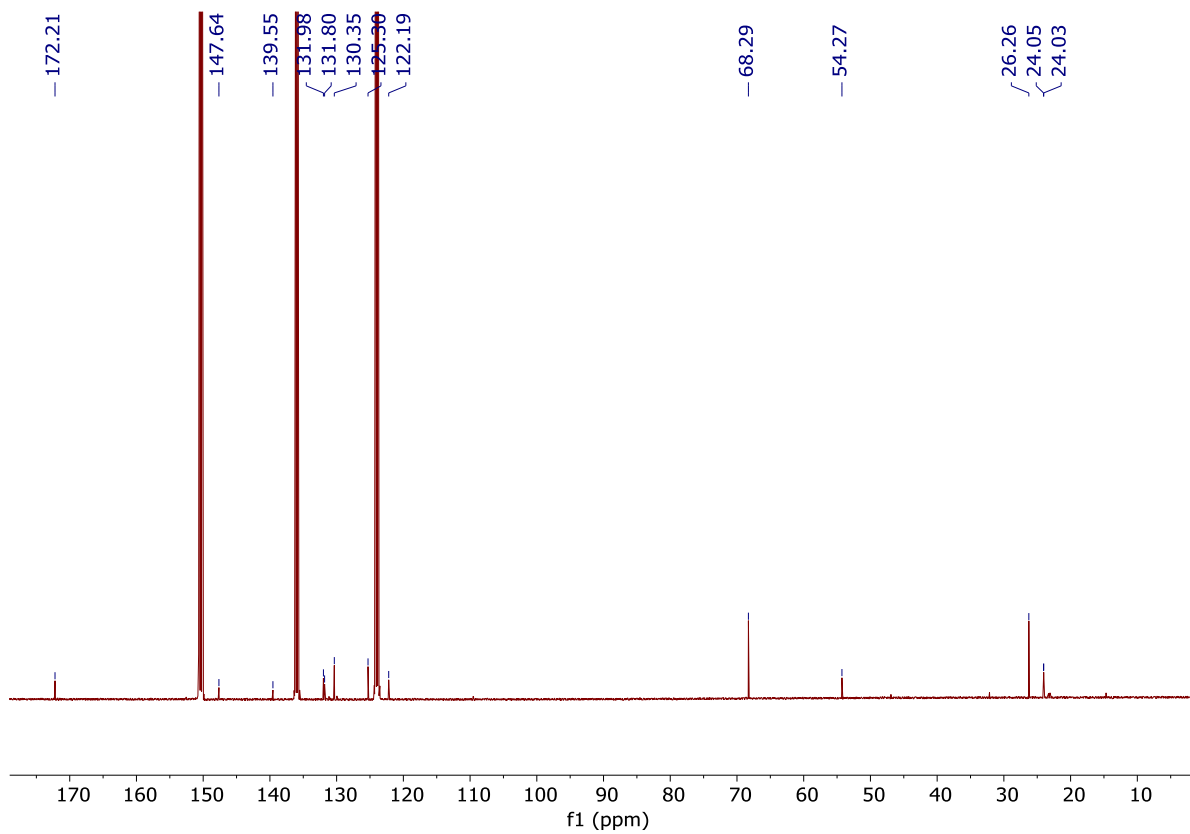

**Figure S15.**  $^{13}\text{C}\{^1\text{H}\}$  NMR spectrum (100 MHz, 298 K, pyridine- $\text{d}_5$ ) of compound **6-I**.

## Single-Crystal X-Ray Diffraction Analysis

Crystal data were collected on a Bruker D8 Quest diffractometer equipped with a CMOS area detector or a Bruker X8-APEX II diffractometer equipped with a CCD area detector (**2-Li-py**, **2-K-thf**, **6-Cl**, **6-I**) using multi-layer mirror monochromated  $\text{MoK}\alpha$  radiation or with a Rigaku XtaLAB Synergy Dualflex diffractometer equipped with a HyPix hybrid photon counting detector using monochromated  $\text{CuK}\alpha$  radiation (**3**). Crystals were kept at 100(2) K during data collection. The structures were solved with the ShelXT program<sup>1</sup> using the intrinsic phasing method, refined with the ShelXL program,<sup>2</sup> and expanded using Fourier techniques. All non-hydrogen atoms were refined anisotropically. Hydrogen atoms were included in structure factors calculations. All hydrogen atoms were assigned to idealised geometric positions.

**2-Li-py**: The displacement parameters of atoms Li1\_5 and Li1\_15 (of the residues 1 and 15) were constrained to the same value with EADP keyword.

The displacement parameters of atoms Li1\_5 and Li1\_15 (of the residues 1 and 15), atoms N3\_4, C20\_4-C24\_4 and N3\_14, C20\_14-C24\_14 (of the residues 4 and 14), atoms C14\_3-C19\_3 and C14\_13-C19\_13 (of the residues 3 and 13), atoms S1\_2, O1\_2 and S1\_12, O1\_12 (of the residues 2 and 12), and atoms N1\_1, N2\_1, C1\_1-C13\_1 and N1\_11, N2\_11, C1\_11-C13\_11 (of the residues 1 and 11) were restrained to the same value with the similarity restraint SIMU.

The distances between atoms C5\_11, S1\_12 and C5\_1, S1\_2, atoms O1\_12, S1\_12 and O1\_2, S1\_2, atoms O1\_12, Li1\_15 and O1\_2, Li1\_5, and atoms C14\_3-C19\_3 and C14\_13-C19\_13 were restrained during refinement to the same value with the SADI restraint.

The atomic displacement parameters of atoms Li1\_5 and Li1\_15 (of the residues 1 and 15), atoms N3\_14, C20\_14-C24\_14 (of the residue 14), atoms C14\_3-C19\_3 and C14\_13-C19\_13 (of the residues 3 and 13), atoms S1\_2, O1\_2 and S1\_12, O1\_12 (of the residues 2 and 12), and atoms N1\_1, N2\_1, C1\_1-C13\_1 and N1\_11, N2\_11, C1\_11-C13\_11 (of the residues 1 and 11) were restraint with the RIGU keyword in the ShelXL input ('enhanced rigid bond' restraint for all bonds in the connectivity list. Standard values of 0.005 for both parameters s1 and s2 were used).

Crystal data for **2-Li-py**:  $\text{C}_{24}\text{H}_{28}\text{LiN}_3\text{OS}$ ,  $M_r = 413.49$ , yellow block,  $0.24 \times 0.205 \times 0.104 \text{ mm}^3$ , Monoclinic space group  $P2_1/n$ ,  $a = 10.0549(17) \text{ \AA}$ ,  $b = 13.985(4) \text{ \AA}$ ,  $c = 16.726(4) \text{ \AA}$ ,  $\beta = 103.829(8)^\circ$ ,  $V = 2283.9(9) \text{ \AA}^3$ ,  $Z = 4$ ,  $\rho_{\text{calcd}} = 1.203 \text{ g}\cdot\text{cm}^{-3}$ ,  $\mu = 0.161 \text{ mm}^{-1}$ ,  $F(000) = 880$ ,  $T = 100(2) \text{ K}$ ,  $R_1 = 0.0494$ ,  $wR^2 = 0.1095$ , 4347 independent reflections [ $2\theta \leq 51.44^\circ$ ] and 544 parameters.

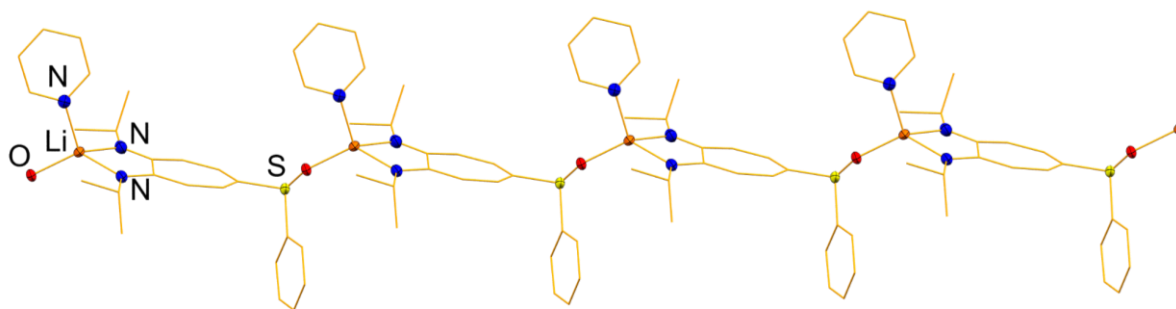

**Figure S16.** Coordination polymer of **2-Li-py**. Hydrogen atoms are omitted and carbon atoms are displayed in the wire-frame model for clarity. Thermal displacement ellipsoids are shown at the 50% probability level.

**2-K-thf:** The displacement parameters of atoms O1\_2, C1\_2-C4\_2 and O1\_21, C1\_21-C4\_21 (of the residues 2 and 21) were restrained to the same value with similarity restraint SIMU.

The distances between atoms C1\_2-C4\_2 (in residue 2) were restrained during refinement to the same value with SADI restraint.

The atomic displacement parameters of atoms O1\_2, C1\_2-C4\_2 and O1\_21, C1\_21-C4\_21 (of the residues 2 and 21) were restrained with the RIGU keyword in the ShelXL input ('enhanced rigid bond' restraint for all bonds in the connectivity list. Standard values of 0.003 for both parameters s1 and s2 were used).

The 1-2 and 1-3 distances in residues 2 (O1\_2, C1\_2-C4\_2) and 21 (O1\_21, C1\_21-C4\_21) were restrained to the same values with the restraint SAME.

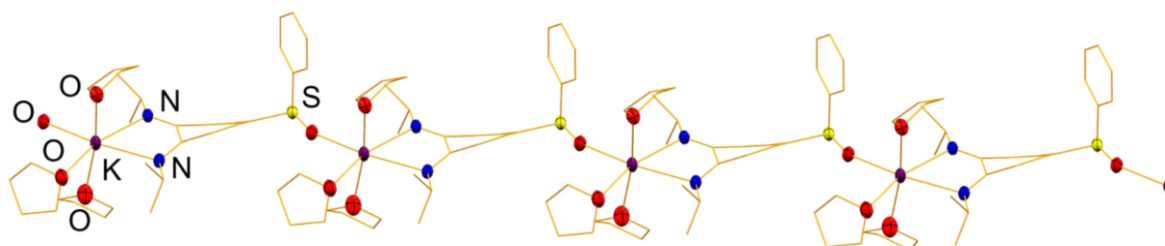

**Figure S17.** Coordination polymer of **2-K-thf**. Hydrogen atoms are omitted and carbon atoms are displayed as wire-frames for clarity. Thermal displacement ellipsoids are shown at the 50% probability level.

Crystal data for **2-K-thf**: C<sub>35</sub>H<sub>55</sub>KN<sub>2</sub>O<sub>5</sub>S,  $M_r = 654.97$ , yellow block, 0.254×0.185×0.181 mm<sup>3</sup>, Monoclinic space group  $P2_1/c$ ,  $a = 17.397(11)$  Å,  $b = 11.350(7)$  Å,  $c = 18.379(11)$  Å,  $\beta = 92.661(8)^\circ$ ,  $V = 3625(4)$  Å<sup>3</sup>,  $Z = 4$ ,  $\rho_{\text{calcd}} = 1.200$  g·cm<sup>-3</sup>,  $\mu = 0.245$  mm<sup>-1</sup>,  $F(000) = 1416.0$ ,  $T = 100(2)$  K,  $R_1 = 0.0556$ ,  $wR^2 = 0.1481$ , 6414 independent reflections [ $2\theta \leq 50.12^\circ$ ] and 447 parameters.

**3:** The displacement parameters of atoms O1\_10-O4\_10, C1\_10-C8\_10 and O1\_110-O4\_110, C1\_110-C8\_110 (of the residues 10 and 110), atoms C1\_4-C3\_4 and C1\_14-C3\_14 (of the residues 4 and 14), atoms S1\_7, S1B\_7 and O1\_7, O1B\_7 (in the residue 7), and atoms S1\_3, S1B\_3 and O1\_3, O2B\_3 (in the residue 3) were restrained to the same value with the similarity restraint SIMU.

The distances between atoms Na2 and O1\_9-O4\_9 and Na2 and O1\_10-O4\_10 and Na2 and O1\_110-O4\_110 and atoms O1\_9-O4\_9 and C1\_9-C8\_9 and atoms N2\_1, C1\_4 and N2\_1, C1\_14 and atoms C1\_4-C3\_4 and C1\_14-C3\_14 were restrained during refinement to the same value with the SADI restraint.

The atomic displacement parameters of atoms C5\_5, C6\_5 (of the residue 5), atoms O1\_10-O4\_10, C1\_10-C8\_10 and O1\_110-O4\_110, C1\_110-C8\_110 (of the residues 10 and 110), atoms S1\_7, S1B\_7 and O1\_7, O1B\_7 (in the residue 7), and atoms S1\_3, S1B\_3 and O1\_3, O2B\_3 (in the residue 3) were restrained with the RIGU keyword in the ShelXL input ('enhanced rigid bond' restraint for all bonds in the connectivity list. Standard values of 0.005 for both parameters s1 and s2 were used).

The 1-2 and 1-3 distances in residues 4 (C1\_4-C3\_4) and 14 (C1\_14-C3\_14) and residue 9 (O1\_9-O4\_9, C1\_9-C8\_9) and 10 (O1\_10-O4\_10, C1\_10-C8\_10) were restrained to the same values with the restraint SAME.

The  $U_{ii}$  displacement parameters of atoms C5, and C6 were restrained with the ISOR keyword to approximate isotropic behavior and with the DELU keyword to apply a rigid bond restraint.

Crystal data for **3**:  $C_{58}H_{86}N_4Na_2O_{11}S_2$ ,  $M_r = 1125.40$ , yellow block,  $0.173 \times 0.115 \times 0.032$  mm<sup>3</sup>, Triclinic space group  $P\bar{1}$ ,  $a = 9.80150(10)$  Å,  $b = 15.37580(10)$  Å,  $c = 20.2757(2)$  Å,  $\alpha = 98.6750(10)^\circ$ ,  $\beta = 95.3650(10)^\circ$ ,  $\gamma = 98.1400(10)^\circ$ ,  $V = 2969.61(5)$  Å<sup>3</sup>,  $Z = 2$ ,  $\rho_{\text{calcd}} = 1.259$  g·cm<sup>-3</sup>,  $\mu = 1.450$  mm<sup>-1</sup>,  $F(000) = 1208.0$ ,  $T = 100(2)$  K,  $R_1 = 0.0792$ ,  $wR^2 = 0.1710$ , 12420 independent reflections [ $2\theta \leq 77.39^\circ$ ] and 879 parameters.

**6-Cl-py**: The quality of the data does not allow for a discussion of bonding parameters, but the connectivity is definite.

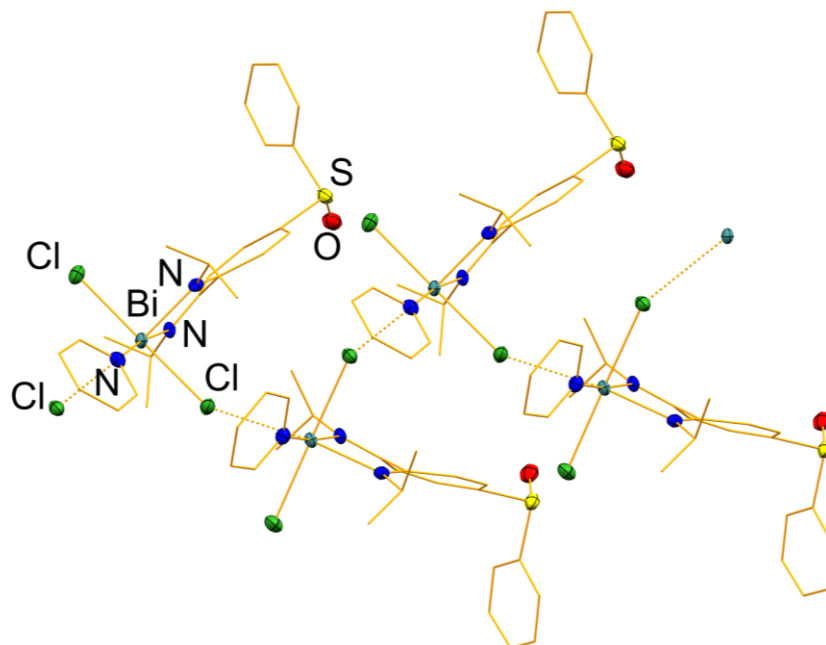

**Figure S18.** Coordination polymer of **6-Cl-py**. Hydrogen atoms are omitted and carbon atoms are displayed as wire-frames for clarity. Thermal displacement ellipsoids are shown at the 50% probability level.

**6-I:** The displacement parameters of atoms N1\_4, C1\_4-C5\_4 (of the residue 4) were restrained to the same value with the similarity restraint SIMU.

The atomic displacement parameters of atoms N1\_4, C1\_4-C5\_4 (of the residue 4) were restrained with the RIGU keyword in the ShelXL input ('enhanced rigid bond' restraint for all bonds in the connectivity list. Standard values of 0.003 for both parameters s1 and s2 were used).

The unit cell contains one molecule which has been treated as a diffuse contribution to the overall scattering without specific atom positions by SQUEEZE/PLATON.<sup>3</sup>

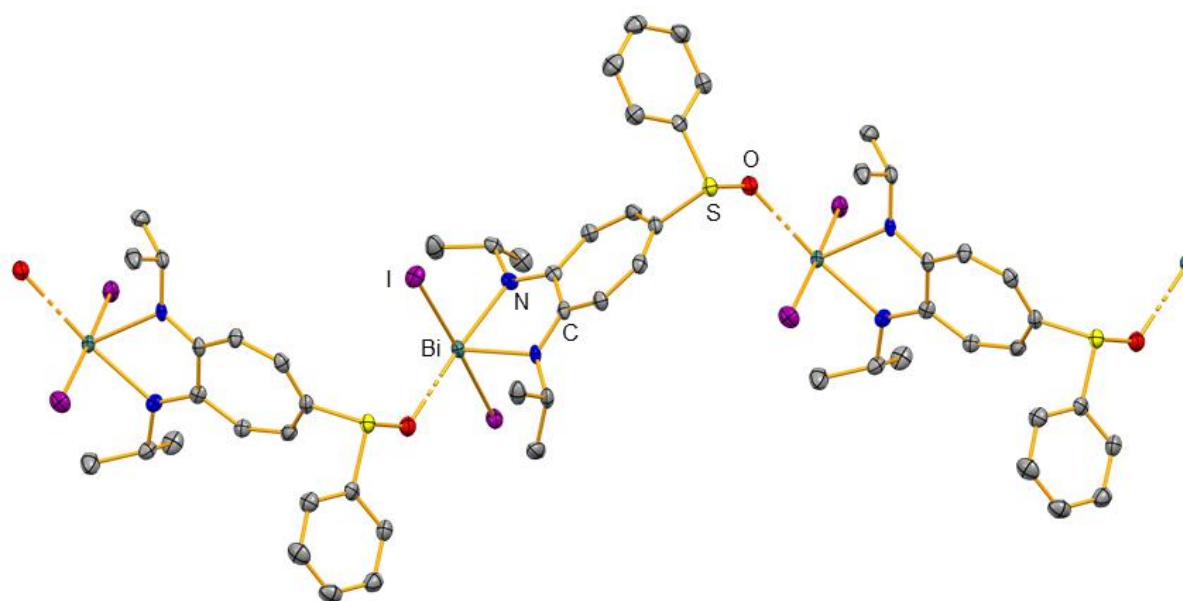

**Figure S19.** Coordination polymer of **6-I-py**. Hydrogen atoms and lattice-bound pyridine molecules are omitted for clarity. Co-crystallized pyridine solvent molecules are not depicted. Thermal displacement ellipsoids are shown at the 50% probability level.

Crystal data for **6-I-py**:  $C_{29}H_{33}BiI_2N_4OS$ ,  $M_r = 948.43$ , red plate,  $0.156 \times 0.137 \times 0.058$  mm<sup>3</sup>, Orthorhombic space group  $Pnna$ ,  $a = 18.727(12)$  Å,  $b = 16.981(4)$  Å,  $c = 21.579(7)$  Å,  $V = 6862(5)$  Å<sup>3</sup>,  $Z = 8$ ,  $\rho_{calcd} = 1.836$  g·cm<sup>-3</sup>,  $\mu = 7.025$  mm<sup>-1</sup>,  $F(000) = 3584$ ,  $T = 100(2)$  K,  $R_1 = 0.0275$ ,  $wR^2 = 0.0619$ , 6111 independent reflections [ $2\theta \leq 50.208^\circ$ ] and 347 parameters.

## Electrochemical analyses

**Table S1.** Redox properties of compounds **1**, **2-Li**, **2-Na** and **2-K** under oxidative conditions, determined by cyclic voltammetry (0.1 M [*n*Bu<sub>4</sub>N][PF<sub>6</sub>], THF, vs. Fc/Fc<sup>+</sup>)

| entry | compound    | $E_{pa}$ or $E_{pa}/E_{pc}$ / V <sup>a</sup> | classification <sup>b</sup> | reversibility <sup>b</sup> |
|-------|-------------|----------------------------------------------|-----------------------------|----------------------------|
| I     | <b>1</b>    | 0.46                                         | E                           | irrev                      |
| II    | <b>2-Li</b> | 0.45                                         | E                           | irrev                      |
| III   | <b>2-Li</b> | -0.26                                        | E                           | irrev                      |
| IV    | <b>2-Na</b> | 0.42                                         | E                           | irrev                      |
| V     | <b>2-Na</b> | -0.55/-1.96                                  | ECEC                        | pr                         |
| VI    | <b>2-K</b>  | 0.45                                         | E                           | irrev                      |
| VII   | <b>2-K</b>  | -0.77                                        | E                           | irrev                      |

a:  $E_{pa}$  for I-IV and VI-VII;  $E_{pa}/E_{pc}$  for V; b: E = electron transfer, C = chemical reaction; c: irrev = irreversible, pr = partially reversible.

The oxidation events described in Table S1, entries I-IV and VI-VII are irreversible. The oxidation that is related to a potential of -0.55 V (entry V, compound 2-Na) proved to show a partially reversible character. At the same time, reduction event associated with this oxidation event is strongly cathodically shifted, showing a peak potential of -1.96 V. This points towards an ECEC series of transformations (E = electron transfer; C = chemical reaction), as reported for related ATI complexes under reducing conditions.<sup>4-7</sup> Products related to these redox events could not be isolated to date. Selected cyclic voltammograms are depicted in Figures S20-S23.

**Table S2.** Redox properties of compounds **1**, **2-Li**, **2-Na** and **2-K** under reductive conditions, determined by cyclic voltammetry (0.1 M [*n*Bu<sub>4</sub>N][PF<sub>6</sub>], THF, vs. Fc/Fc<sup>+</sup>).

| entry | compound    | $E_{1/2}$ or $E_{pc}$ [V] <sup>[a]</sup> | classification <sup>[b]</sup> | reversibility <sup>[c]</sup> |
|-------|-------------|------------------------------------------|-------------------------------|------------------------------|
| I     | <b>1</b>    | -2.38                                    | EE                            | rev                          |
| II    | <b>2-Li</b> | -2.38                                    | E                             | qr                           |
| III   | <b>2-Na</b> | -2.44                                    | E                             | irrev                        |
| IV    | <b>2-K</b>  | -2.37                                    | EE                            | rev                          |

a:  $E_{1/2}$  for entries I, II, and IV,  $E_{pc}$  for entry III, b: E = electron transfer; c: rev = reversible; irrev = irreversible, qr = quasi-reversible.

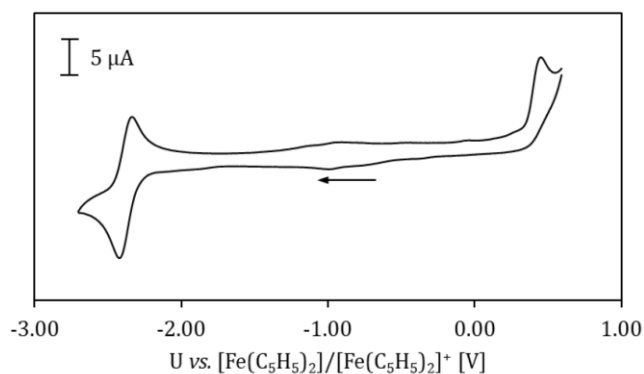

**Figure S20.** Cyclic voltammogram of compound **1** at room temperature in THF containing 0.1 M  $[(n\text{Bu})_4\text{N}][\text{PF}_6]$  at a scan rate of  $250 \text{ mV}\cdot\text{s}^{-1}$ .

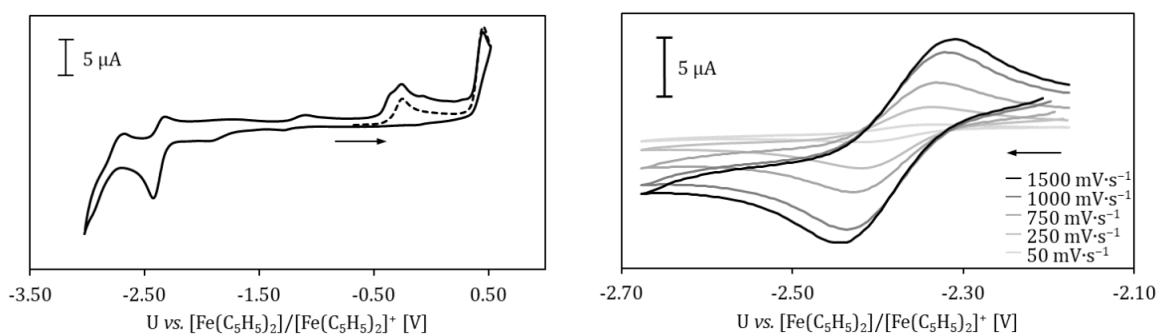

**Figure S21.** Cyclic voltammograms of compound **2-Li** at room temperature in THF containing 0.1 M  $[(n\text{Bu})_4\text{N}][\text{PF}_6]$ . Left: full potential window at a scan rate of  $250 \text{ mV}\cdot\text{s}^{-1}$  (dotted line indicates starting point). Right: analysis of the redox event at  $E_{1/2} = -2.38 \text{ V}$  at varying scan rates.

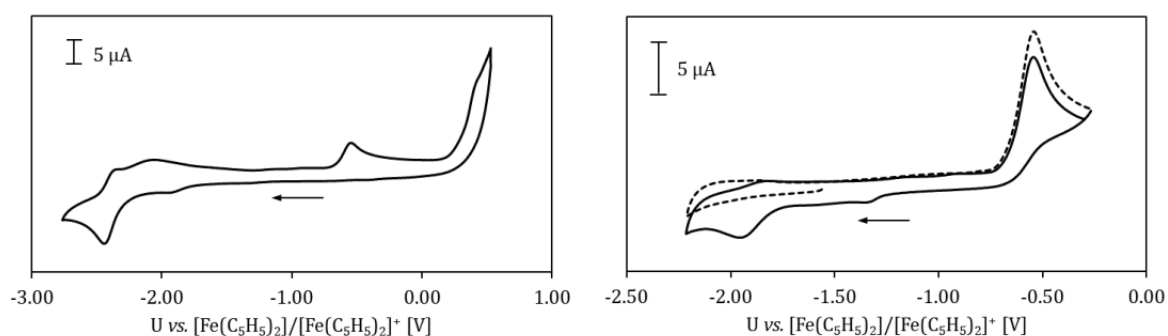

**Figure S22.** Cyclic voltammogram of compound **2-Na** at room temperature in THF containing 0.1 M  $[(n\text{Bu})_4\text{N}][\text{PF}_6]$ . Left: full potential window at a scan rate of  $250 \text{ mV}\cdot\text{s}^{-1}$ . Right: analysis of the redox event at  $E_{\text{pa}} / E_{\text{pa}} = -0.55 / -1.96 \text{ V}$  (dotted line indicates starting point).



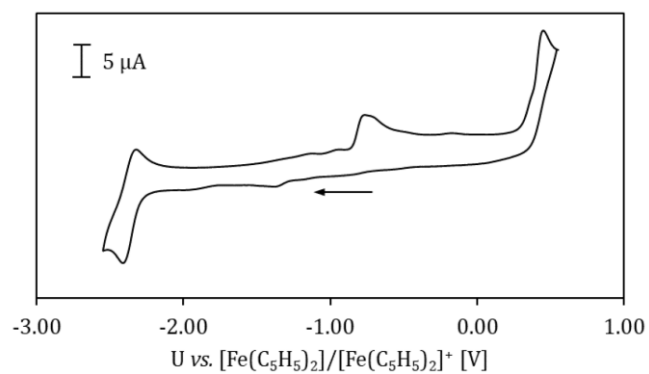

**Figure S23.** Cyclic voltammogram of compound **2-K** at room temperature in THF containing 0.1 M [(*n*Bu)<sub>4</sub>N][PF<sub>6</sub>] at a scan rate of 250 mV·s<sup>-1</sup>.

## DOSY NMR Spectroscopic Studies

In a pulsed field gradient (PFG) diffusion experiment, a pair of pulsed field gradients is implemented into a spin-echo with an echo delay. Due to changes in the molecules spatial position caused by their translational diffusion, incomplete re-focusing of the signal occurs. Such incomplete refocusing results in an attenuation in the signal intensity, which can be correlated to the duration of the delay, the strength of the applied gradients, and the diffusion coefficient of the molecule, as described by the Stejskel-Tanner relation in equation (1)

$$I = I_0 \exp \left[ -D\gamma^2 \delta^2 g^2 \left( \Delta - \frac{\delta}{3} \right) \right] \quad (1)$$

$I_0$  is the signal intensity in the absence of an applied gradient,  $\gamma$  is the gyromagnetic ratio of the investigated nucleus,  $\delta$  the duration of the gradient pulses,  $g$  the strength of the applied gradient, and  $\Delta$  is the total delay where diffusion occurs. In a typical DOSY experiment, the signal attenuation is detected by varying the gradient strength  $g$  while holding the gradient duration  $\delta$  and the diffusion delay  $\Delta$  constant. By fitting the experimental data to a non-linear exponential decay using equation (1), the diffusion coefficient  $D$  can be extracted.

Based on the Stokes-Einstein theory, as shown in equation (2), where  $k$  is the Boltzmann constant,  $T$  is the absolute temperature, and  $\eta$  the viscosity of the sample solution, the hydrodynamic radius  $R_H$  can be obtained from the experimentally determined diffusion coefficient  $D$ .

$$D = \frac{kT}{6\pi\eta R_H} \quad (2)$$

In a DOSY experiment, it is necessary to know the accurate viscosity of the sample solution at the measurement temperature. In order to confirm a constant viscosity of the samples throughout our experiments, the diffusion coefficient of the solvent was measured and normalised with the true viscosity of the solvent.<sup>8</sup>

Furthermore, assuming a spherical shape of the molecules in concern, aggregation of the molecules in solution can be studied by a comparison of the experimentally obtained hydrodynamic radius  $R_H$  (Table S3) with the van der Waals radii  $R_W$  and molecular volumes  $V_W$ .<sup>9,10</sup> The van der Waals radii  $R_W$  and molecular volumes  $V_W$  can be obtained by the empirical method of hard-sphere increments (HSI).<sup>11,12</sup> Taking solvent molecules coordinated to the alkali metal atom into consideration, theoretical hydrodynamic radii  $R_H^{\text{HSI}}$  were obtained. For the monomeric subunits, the species  $[\text{Li}(\text{Ph}(\text{O})\text{S}-\text{ATI}^{iPr/iPr})(\text{py})]$ ,  $[\text{Na}(\text{Ph}(\text{O})\text{S}-\text{ATI}^{iPr/iPr})(\text{py})_2]$ , and  $[\text{K}(\text{Ph}(\text{O})\text{S}-\text{ATI}^{iPr/iPr})(\text{py})_3]$  were employed. The degree of oligomerisation  $n$  was thus calculated as  $(R_H / R_H^{\text{HSI}})^3$ , giving compounds of type  $[\text{Li}(\text{Ph}(\text{O})\text{S}-\text{ATI}^{iPr/iPr})(\text{py})]_n$ ,

$[\text{Na}(\text{Ph}(\text{O})\text{S}-\text{ATI}^{iPr/iPr})(\text{py})_2]_n$ , and  $[\text{K}(\text{Ph}(\text{O})\text{S}-\text{ATI}^{iPr/iPr})(\text{py})_3]_n$ , which reflect the mean degree of oligomerisation for oligomerisation reactions in equilibrium. The free ligand **1** was used as a reference compound and was found to be present as a monomer in pyridine solution according to the procedure described above, justifying its applicability for the compounds investigated in this work.

**Table S3.** Diffusion coefficients and hydrodynamic radii of compounds **1**, **2-Li**, **2-Na**, and **2-K** in pyridine- $d_5$  at 298 K as determined by DOSY NMR spectroscopy and Stokes-Einstein theory.

| Compound                   | $D \times 10^{-9} [\text{m}^2 \cdot \text{s}^{-1}]$ | $R_H [\text{Å}]$ |
|----------------------------|-----------------------------------------------------|------------------|
| H-ATI-(S=O)Ph ( <b>1</b> ) | 0.58                                                | 4.7              |
| <b>2-Li</b>                | 0.44                                                | 5.8              |
| <b>2-Na</b>                | 0.41                                                | 6.3              |
| <b>2-K</b>                 | 0.42                                                | 6.1              |

Experimental details. About 3 mg of the samples were dissolved in about 0.5 mL pyridine- $d_5$  or THF- $d_8$ . NMR spectroscopic measurements were performed on a Bruker AVIII 500 spectrometer with a cryo probe Prodigy BB-H&F with a z-gradient at 298 K. The temperature was calibrated with a Bruker standard 4% methanol in methanol- $d_4$ . The DOSY experiments were carried out using a pulse sequence with a long delay for the recovery of the eddy current and bipolar gradients. The pulse sequence was ledbpgp3s from the Bruker pulse program library. The gradient shape used was smoothed using square SMSQ10.100, and the gradient length was between 2 and 3 ms. The optimized diffusion delays ( $\Delta$ ) were between 30 and 50 ms. The diffusion attenuation was realized with 9 steps in a gradient ramp. The DOSY 2D spectra were recorded with 9 experiments and each with 16 to 32 transients. The relaxation delays were 3 s.

## DFT Calculations

DFT calculations were performed with the Gaussian 16, Revision A.03 program package<sup>13</sup> using the B3LYP<sup>14–17</sup> functional and the 6-311++G(d,p).<sup>18,19</sup> The D3 version of Grimme's dispersion model with the original D3 damping function was applied.<sup>20</sup> Frequency analyses of the reported structures showed no imaginary frequencies for minimum energy structures and only one imaginary frequency for transition states.

The results of geometry optimization are shown in Figure S24 using the lithium species  $[\text{Li}(\text{Ph}(\text{O})\text{S}-\text{ATI}^{\text{iPr/iPr}})(\text{thf})_2]$  and  $[\text{Li}(\text{Ph}(\text{O})\text{S}-\text{ATI}^{\text{iPr/iPr}})(\text{thf})]_2$  as examples. For model compound  $[\text{Li}(\text{Ph}(\text{O})\text{S}-\text{ATI}^{\text{iPr/iPr}})(\text{thf})_2]$ , the HOMO-1 is also depicted, showing a significant contribution by a p(O) atomic orbital and antibonding character with respect to the S-O moiety of the sulfinyl group.

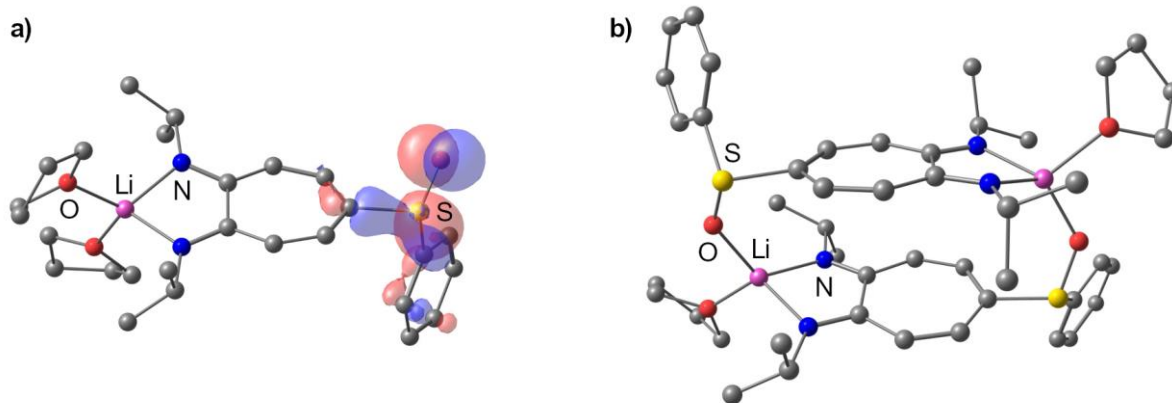

**Figure S24.** Molecular structures of  $[\text{Li}(\text{Ph}(\text{O})\text{S}-\text{ATI}^{\text{iPr/iPr}})(\text{thf})_2]$  and  $[\text{Li}(\text{Ph}(\text{O})\text{S}-\text{ATI}^{\text{iPr/iPr}})(\text{thf})]_2$  as obtained by geometry optimization. The HOMO-1 of  $[\text{Li}(\text{Ph}(\text{O})\text{S}-\text{ATI}^{\text{iPr/iPr}})(\text{thf})_2]$  is shown at an iso-value of 0.05. Hydrogen atoms are omitted for clarity.

The energies of compounds investigated by DFT calculations are given in Table S4. Their Cartesian coordinates are given in Table S5.

**Table S4** Energies of calculated species.

| # | Compound                                                                               | $\Delta H$ [hartree] | $\Delta G$ [hartree] | Imaginary frequencies |
|---|----------------------------------------------------------------------------------------|----------------------|----------------------|-----------------------|
| 1 | $[\text{Li}(\text{Ph}(\text{O})\text{S}-\text{ATI}^{\text{iPr/iPr}})(\text{thf})_2]$   | -1793.080953         | -1793.194673         | none                  |
| 2 | $[\text{Li}(\text{Ph}(\text{O})\text{S}-\text{ATI}^{\text{iPr/iPr}})(\text{thf})]_2$   | -3121.389831         | -3121.555835         | none                  |
| 3 | $[\text{Na}(\text{Ph}(\text{O})\text{S}-\text{ATI}^{\text{iPr/iPr}})(\text{thf})_3]$   | -2180.255667         | -2180.388502         | none                  |
| 4 | $[\text{Na}(\text{Ph}(\text{O})\text{S}-\text{ATI}^{\text{iPr/iPr}})(\text{thf})_2]_2$ | -3895.738116         | -3895.938149         | none                  |
| 5 | $[\text{K}(\text{Ph}(\text{O})\text{S}-\text{ATI}^{\text{iPr/iPr}})(\text{thf})_4]$    | -2850.310466         | -2850.462398         | none                  |
| 6 | $[\text{K}(\text{Ph}(\text{O})\text{S}-\text{ATI}^{\text{iPr/iPr}})(\text{thf})_3]_2$  | -5235.853037         | -5236.089143         | none                  |
| 7 | THF                                                                                    | -232.403972          | -232.438308          | none                  |

**Table S5.** Cartesian coordinates of compounds investigated by DFT calculations.

| <b>Compound [Li(Ph(O)S-ATi<sup>iPr</sup>/<sup>iPr</sup>)(thf)<sub>2</sub>]</b> |              |              |              | <b>Compound [Li(Ph(O)S-ATi<sup>iPr</sup>/<sup>iPr</sup>)(thf)<sub>2</sub>]</b> |              |              |              |
|--------------------------------------------------------------------------------|--------------|--------------|--------------|--------------------------------------------------------------------------------|--------------|--------------|--------------|
| N                                                                              | -1.242709919 | -0.920137692 | -0.912410328 | C                                                                              | 6.708725803  | 1.791332537  | -0.230528165 |
| N                                                                              | -1.135631120 | 0.169792854  | 1.460757648  | H                                                                              | 7.363611965  | 2.469901710  | 0.305120979  |
| C                                                                              | -0.089875853 | -1.058099583 | -0.290740123 | C                                                                              | 6.229727046  | 0.645316097  | 0.407063903  |
| C                                                                              | 0.018651348  | -0.260878399 | 0.999479110  | H                                                                              | 6.491600726  | 0.405453736  | 1.431466555  |
| C                                                                              | 1.274433153  | 0.057614533  | 1.621198078  | C                                                                              | -3.320861568 | 4.246722222  | -0.977872930 |
| H                                                                              | 1.204291021  | 0.798579979  | 2.406315544  | H                                                                              | -3.665088389 | 5.128074175  | -0.434203478 |
| C                                                                              | 2.561969608  | -0.385427673 | 1.407290282  | H                                                                              | -3.646144347 | 4.338066280  | -2.018291500 |
| H                                                                              | 3.321758555  | 0.055939883  | 2.048918893  | C                                                                              | -3.846814022 | 2.946207907  | -0.368557214 |
| C                                                                              | 3.027636120  | -1.359047701 | 0.524552421  | H                                                                              | -3.932060016 | 3.015287081  | 0.721907466  |
| C                                                                              | 2.271473455  | -2.089774938 | -0.386465010 | H                                                                              | -4.812240470 | 2.634622178  | -0.773739039 |
| H                                                                              | 2.805811801  | -2.869737006 | -0.926874029 | O                                                                              | -2.868829340 | 1.936100002  | -0.694732177 |
| C                                                                              | 0.938997326  | -1.951940124 | -0.735388585 | C                                                                              | -1.799349790 | 4.042750566  | -0.908916409 |
| H                                                                              | 0.625799236  | -2.648184859 | -1.501415257 | H                                                                              | -1.250072314 | 4.662665859  | -1.619250483 |
| C                                                                              | -1.506880837 | -1.615642336 | -2.168946231 | H                                                                              | -1.428600150 | 4.262627782  | 0.095213944  |
| H                                                                              | -0.591053998 | -1.714186115 | -2.768892586 | C                                                                              | -1.659829456 | 2.553177100  | -1.213071966 |
| C                                                                              | -2.066914369 | -3.025270756 | -1.905095110 | H                                                                              | -1.612189555 | 2.361070704  | -2.289639951 |
| H                                                                              | -2.247827445 | -3.559664767 | -2.842975163 | H                                                                              | -0.808058496 | 2.074026199  | -0.730083334 |
| H                                                                              | -3.014333107 | -2.954635097 | -1.364193029 | O                                                                              | -4.304054132 | -0.579758746 | 0.483250161  |
| H                                                                              | -1.381130336 | -3.618500106 | -1.296632128 | C                                                                              | -5.375050013 | -2.726667734 | 0.505189848  |
| C                                                                              | -2.499597544 | -0.791133270 | -2.997549372 | H                                                                              | -6.206930301 | -2.854432782 | 1.201862653  |
| H                                                                              | -2.727534183 | -1.291029538 | -3.943679658 | H                                                                              | -5.017028028 | -3.719448376 | 0.229041010  |
| H                                                                              | -2.090797260 | 0.196805490  | -3.220370142 | C                                                                              | -4.261882166 | -1.871828001 | 1.144875470  |
| H                                                                              | -3.436662002 | -0.649772378 | -2.450766041 | H                                                                              | -4.415252270 | -1.721126581 | 2.216058812  |
| C                                                                              | -1.225718429 | 0.875478085  | 2.737177946  | H                                                                              | -3.259627585 | -2.272682487 | 0.987025887  |
| H                                                                              | -0.445176594 | 0.539789317  | 3.432769734  | C                                                                              | -5.821012288 | -1.901853053 | -0.717793028 |
| C                                                                              | -2.576810670 | 0.548811027  | 3.385707679  | H                                                                              | -5.216333765 | -2.147452654 | -1.593547889 |
| H                                                                              | -2.685782347 | 1.069361480  | 4.341913240  | H                                                                              | -6.871439869 | -2.052744617 | -0.972819229 |
| H                                                                              | -2.661194835 | -0.525253095 | 3.567595017  | C                                                                              | -5.522087627 | -0.475050278 | -0.269839630 |
| H                                                                              | -3.403357015 | 0.846498704  | 2.732671118  | H                                                                              | -5.344427055 | 0.223814758  | -1.088630866 |
| C                                                                              | -1.077489611 | 2.393326629  | 2.535661688  | H                                                                              | -6.319956794 | -0.077708224 | 0.371898801  |
| H                                                                              | -1.110539910 | 2.922278359  | 3.492916957  | Li                                                                             | -2.550383161 | 0.165301307  | 0.085125986  |
| H                                                                              | -1.894482037 | 2.765044785  | 1.911742449  | <b>Compound [Li(Ph(O)S-ATi<sup>iPr</sup>/<sup>iPr</sup>)(thf)<sub>2</sub>]</b> |              |              |              |
| H                                                                              | -0.135609512 | 2.637760802  | 2.038761113  | N                                                                              | -2.117784882 | -1.533008874 | -0.789302591 |
| O                                                                              | 5.307121541  | -1.599964295 | 1.988801754  | N                                                                              | -2.316583931 | -1.828953378 | 1.779323521  |
| S                                                                              | 4.799224546  | -1.732777858 | 0.562068261  | C                                                                              | -0.973236031 | -1.710079853 | -0.181773982 |
| C                                                                              | 5.386001548  | -0.211891016 | -0.288463656 | C                                                                              | -1.089031136 | -1.875516541 | 1.333431320  |
| C                                                                              | 5.024887390  | 0.042471829  | -1.610650750 | C                                                                              | 0.043851572  | -2.068601101 | 2.201314611  |
| H                                                                              | 4.357088488  | -0.632322944 | -2.135433674 | H                                                                              | -0.217794851 | -2.165666983 | 3.245803454  |
| C                                                                              | 5.510976863  | 1.184910142  | -2.240376603 | C                                                                              | 1.400398315  | -2.110017470 | 1.985709078  |
| H                                                                              | 5.232302942  | 1.394051458  | -3.267374306 | H                                                                              | 1.996515121  | -2.232283403 | 2.886876750  |
| C                                                                              | 6.352786474  | 2.060964486  | -1.550558027 | C                                                                              | 2.130365018  | -2.013163730 | 0.791729483  |
| H                                                                              | 6.730152825  | 2.949631097  | -2.044149360 | C                                                                              | 1.587850650  | -1.851439426 | -0.491898414 |

|   |              |              |              |   |              |              |              |
|---|--------------|--------------|--------------|---|--------------|--------------|--------------|
| H | 2.307424699  | -1.807765835 | -1.303247542 | C | -6.567765631 | -1.767547867 | -0.023566868 |
| C | 0.279680378  | -1.748949985 | -0.892135034 | H | -6.535891433 | -0.679767806 | 0.015366654  |
| H | 0.179121614  | -1.640837248 | -1.962867226 | H | -7.185718502 | -2.138461446 | 0.805783986  |
| C | -2.207412485 | -1.400941494 | -2.242888072 | N | 2.117814696  | 1.532999423  | -0.789311275 |
| H | -1.394111885 | -0.772744646 | -2.633476710 | N | 2.316590350  | 1.828811161  | 1.779334814  |
| C | -2.134038471 | -2.781283912 | -2.920294579 | C | 0.973260119  | 1.710025993  | -0.181779238 |
| H | -2.187310470 | -2.683856623 | -4.009004652 | C | 1.089041513  | 1.875387575  | 1.333436109  |
| H | -2.974899093 | -3.399204016 | -2.591624256 | C | -0.043856233 | 2.068398944  | 2.201320072  |
| H | -1.212484240 | -3.307022996 | -2.663567099 | H | 0.217776558  | 2.165379264  | 3.245819879  |
| C | -3.526347899 | -0.708497866 | -2.604595618 | C | -1.400399760 | 2.109812404  | 1.985700145  |
| H | -3.608324694 | -0.576515324 | -3.687654762 | H | -1.996533118 | 2.231993519  | 2.886868124  |
| H | -3.601470214 | 0.269627444  | -2.129711590 | C | -2.130344438 | 2.013060773  | 0.791699193  |
| H | -4.375589313 | -1.305517464 | -2.263232990 | C | -1.587815910 | 1.851437590  | -0.491933248 |
| C | -2.639676948 | -2.000517182 | 3.193990328  | H | -2.307380867 | 1.807833946  | -1.303294983 |
| H | -1.971335243 | -2.731247536 | 3.670614757  | C | -0.279641151 | 1.748949149  | -0.892158085 |
| C | -4.064771753 | -2.554965958 | 3.311505524  | H | -0.179065196 | 1.640910909  | -1.962896982 |
| H | -4.329553940 | -2.713752322 | 4.361397647  | C | 2.207428572  | 1.401012716  | -2.242905604 |
| H | -4.150767898 | -3.508497835 | 2.784270673  | H | 1.394197294  | 0.772733771  | -2.633506201 |
| H | -4.786770714 | -1.861598238 | 2.871965678  | C | 2.133851100  | 2.781372232  | -2.920251303 |
| C | -2.514489047 | -0.662636894 | 3.941152662  | H | 2.187061238  | 2.683991849  | -4.008968563 |
| H | -2.732185021 | -0.790415499 | 5.006036884  | H | 2.974659625  | 3.399382704  | -2.591619700 |
| H | -3.226174629 | 0.057640784  | 3.528476890  | H | 1.212249249  | 3.306988700  | -2.663442494 |
| H | -1.512426684 | -0.243044995 | 3.833648303  | C | 3.526448750  | 0.708762280  | -2.604670031 |
| O | 4.455453177  | -0.569450532 | 0.635336068  | H | 3.608448077  | 0.576876223  | -3.687739181 |
| S | 3.891144777  | -1.960229331 | 1.019023992  | H | 3.601692738  | -0.269398098 | -2.129876640 |
| C | 4.440657641  | -3.023010931 | -0.357600035 | H | 4.375612025  | 1.305866906  | -2.263259984 |
| C | 4.006926198  | -4.346824598 | -0.421596628 | C | 2.639670450  | 2.000318693  | 3.194011913  |
| H | 3.302450058  | -4.725489697 | 0.310468506  | H | 1.971335401  | 2.731043528  | 3.670654482  |
| C | 4.463215954  | -5.160710907 | -1.454090750 | C | 4.064773431  | 2.554735511  | 3.311574560  |
| H | 4.125040893  | -6.188803864 | -1.517070674 | H | 4.329530022  | 2.713487369  | 4.361478574  |
| C | 5.345598336  | -4.653148612 | -2.410894356 | H | 4.150802850  | 3.508278983  | 2.784366883  |
| H | 5.695496736  | -5.289887746 | -3.215538251 | H | 4.786765597  | 1.861363579  | 2.872033259  |
| C | 5.773478253  | -3.329762488 | -2.332126428 | C | 2.514449782  | 0.662415185  | 3.941126817  |
| H | 6.455442468  | -2.933142161 | -3.076032263 | H | 2.732133331  | 0.790157837  | 5.006017961  |
| C | 5.326019201  | -2.507470982 | -1.296765385 | H | 3.226130940  | -0.057856575 | 3.528435165  |
| H | 5.637450172  | -1.474016348 | -1.213647150 | H | 1.512381645  | 0.242844076  | 3.833596254  |
| O | -5.224498985 | -2.234545450 | 0.147485305  | O | -4.455405461 | 0.569364387  | 0.634931168  |
| C | -6.133428746 | -3.632296768 | -1.526958992 | S | -3.891128965 | 1.960069969  | 1.018935979  |
| H | -6.722551564 | -4.550834900 | -1.550964551 | C | -4.440624435 | 3.023142114  | -0.357475540 |
| H | -5.555149510 | -3.585219106 | -2.451250164 | C | -4.007021910 | 4.347016255  | -0.421096349 |
| C | -5.202391674 | -3.594610526 | -0.298817204 | H | -3.302658511 | 4.725568963  | 0.311135480  |
| H | -5.574005577 | -4.242586268 | 0.506016708  | C | -4.463286662 | 5.161114801  | -1.453434105 |
| H | -4.164054893 | -3.850522364 | -0.508090166 | H | -4.125209685 | 6.189257898  | -1.516122188 |
| C | -7.018835313 | -2.363690010 | -1.366835825 | C | -5.345516261 | 4.653701448  | -2.410457552 |
| H | -6.827193613 | -1.658611872 | -2.177868842 | H | -5.695395822 | 5.290606369  | -3.214978466 |
| H | -8.086002570 | -2.592942405 | -1.370042522 | C | -5.773265418 | 3.330250744  | -2.332067584 |

|    |              |              |              |
|----|--------------|--------------|--------------|
| H  | -6.455108028 | 2.933745624  | -3.076146365 |
| C  | -5.325831819 | 2.507745604  | -1.296864569 |
| H  | -5.637158966 | 1.474235972  | -1.214043430 |
| O  | 5.224392959  | 2.234551155  | 0.147638563  |
| C  | 6.133509498  | 3.632112783  | -1.526919504 |
| H  | 6.722742227  | 4.550586287  | -1.550718722 |
| H  | 5.555491200  | 3.585143381  | -2.451379236 |
| C  | 5.202150386  | 3.594508871  | -0.298995586 |
| H  | 5.573417661  | 4.242740963  | 0.505787425  |
| H  | 4.163817256  | 3.850162142  | -0.508596409 |
| C  | 7.018764826  | 2.363429210  | -1.366593372 |
| H  | 6.826905053  | 1.658170491  | -2.177419306 |
| H  | 8.085966427  | 2.592517920  | -1.369997018 |
| C  | 6.567732399  | 1.767678896  | -0.023158620 |
| H  | 6.536012615  | 0.679905943  | 0.016143736  |
| H  | 7.185589436  | 2.138968287  | 0.806098360  |
| Li | -3.637248994 | -1.147258382 | 0.459720845  |
| Li | 3.637254518  | 1.147100703  | 0.459717535  |

**Compound [Na(Ph(O)S-ATl<sup>Pr</sup>/iPr)(thf)<sub>3</sub>]**

|   |             |             |             |
|---|-------------|-------------|-------------|
| N | -0.68138910 | -0.35191282 | -1.07293425 |
| N | -0.48878901 | -0.86070778 | 1.61214102  |
| C | 0.41090840  | -0.90524214 | -0.60758778 |
| C | 0.60456501  | -0.82769669 | 0.89773144  |
| C | 1.92142918  | -0.62057403 | 1.45627372  |
| H | 1.91693341  | -0.17447642 | 2.44395593  |
| C | 3.17740280  | -0.88928985 | 0.96433616  |
| H | 4.00570431  | -0.61910312 | 1.61571262  |
| C | 3.53644278  | -1.53388705 | -0.22445556 |
| C | 2.67379027  | -1.95231057 | -1.23724490 |
| H | 3.12719943  | -2.54095350 | -2.03316750 |
| C | 1.33051744  | -1.67067895 | -1.40927446 |
| H | 0.90419649  | -2.07487264 | -2.31953476 |
| C | -0.93539090 | -0.32080745 | -2.51107533 |
| H | -0.00179241 | -0.39145994 | -3.08632318 |
| C | -1.84571077 | -1.49055321 | -2.91877133 |
| H | -2.05605284 | -1.47383215 | -3.99274048 |
| H | -2.79662830 | -1.42789118 | -2.38073913 |
| H | -1.38747206 | -2.45179479 | -2.67369770 |
| C | -1.59279389 | 1.01955266  | -2.86560336 |
| H | -1.83572931 | 1.06724611  | -3.93174986 |
| H | -0.92671122 | 1.85245381  | -2.62920302 |
| H | -2.51409522 | 1.15285077  | -2.29280407 |
| C | -0.41391559 | -0.97735239 | 3.06814530  |
| H | 0.54888205  | -1.40118897 | 3.38473448  |

|   |             |             |             |
|---|-------------|-------------|-------------|
| C | -1.51205435 | -1.94282675 | 3.53371492  |
| H | -1.51551155 | -2.03373759 | 4.62433761  |
| H | -1.34915157 | -2.93555962 | 3.10829279  |
| H | -2.49669532 | -1.59375099 | 3.20734662  |
| C | -0.57851045 | 0.39168196  | 3.74579645  |
| H | -0.53260705 | 0.29604415  | 4.83483634  |
| H | -1.54573632 | 0.83371577  | 3.48569637  |
| H | 0.20137316  | 1.08556750  | 3.42872771  |
| O | 5.93729179  | -2.31990471 | 0.80500693  |
| S | 5.28542741  | -1.87363246 | -0.49537143 |
| C | 5.83798951  | -0.13392181 | -0.71859309 |
| C | 5.33273854  | 0.64056763  | -1.76220355 |
| H | 4.57249887  | 0.23696440  | -2.42240829 |
| C | 5.79433821  | 1.94328325  | -1.92841233 |
| H | 5.40426367  | 2.55459129  | -2.73497657 |
| C | 6.75434136  | 2.46363973  | -1.05642071 |
| H | 7.11182869  | 3.47887425  | -1.18854820 |
| C | 7.25229990  | 1.67750822  | -0.01921781 |
| H | 7.99771051  | 2.08014763  | 0.65804645  |
| C | 6.79907620  | 0.36766150  | 0.15063035  |
| H | 7.16791476  | -0.27009952 | 0.94614767  |
| C | -0.28662801 | 3.86069088  | 2.37305271  |
| H | -0.07868928 | 3.51464518  | 3.38615862  |
| H | -0.18446411 | 4.94775650  | 2.36761418  |
| C | -1.70414199 | 3.44438604  | 1.91158273  |
| H | -2.30480631 | 2.98933987  | 2.70086483  |
| H | -2.25645699 | 4.30227944  | 1.50462409  |
| O | -1.52759798 | 2.46402468  | 0.88013878  |
| C | 0.65473270  | 3.19217827  | 1.34030507  |
| H | 1.44685228  | 3.85881812  | 0.99543919  |
| H | 1.12584380  | 2.29957457  | 1.75388947  |
| C | -0.29213553 | 2.78530244  | 0.21335087  |
| H | -0.46602151 | 3.61519636  | -0.48787519 |
| H | 0.01561146  | 1.90116492  | -0.34058725 |
| O | -3.63048576 | -1.76272192 | 0.63487563  |
| C | -3.85584644 | -3.77349707 | -0.58554842 |
| H | -3.75535355 | -4.84341498 | -0.39546196 |
| H | -3.64723082 | -3.60358401 | -1.64273493 |
| C | -2.89672981 | -2.95616947 | 0.29722679  |
| H | -2.64877830 | -3.49188555 | 1.22025489  |
| H | -1.97168018 | -2.64573069 | -0.18337497 |
| C | -5.26445997 | -3.23439511 | -0.20654954 |
| H | -5.73839952 | -2.75506245 | -1.06595149 |
| H | -5.93662905 | -4.01784434 | 0.14803919  |
| C | -4.96742352 | -2.19811570 | 0.89031257  |
| H | -5.61597865 | -1.32229006 | 0.87242955  |

|    |             |             |             |
|----|-------------|-------------|-------------|
| H  | -5.01833266 | -2.65386721 | 1.88936308  |
| O  | -4.29390801 | 1.26906251  | -0.36857280 |
| H  | -3.37447335 | 3.03261290  | -0.91864811 |
| C  | -4.35678597 | 2.70377800  | -0.57213023 |
| H  | -4.56065218 | 3.18226038  | 0.38884752  |
| C  | -5.45880639 | 2.94377475  | -1.61142610 |
| H  | -6.41751840 | 3.13289242  | -1.11998782 |
| C  | -5.50591147 | 1.60583701  | -2.36643496 |
| H  | -6.46033947 | 1.42505549  | -2.86411109 |
| H  | -6.15293247 | 0.38813236  | -0.68434128 |
| H  | -5.23693367 | 3.79475419  | -2.25735551 |
| H  | -4.78476108 | -0.32710346 | -1.56734390 |
| C  | -5.23381200 | 0.61203329  | -1.24152358 |
| H  | -4.71111315 | 1.55635521  | -3.11486690 |
| Na | -2.34565167 | 0.21687677  | 0.53665136  |

|   |             |             |             |
|---|-------------|-------------|-------------|
| H | 4.57465983  | -3.50170720 | -2.26002470 |
| C | 3.21813820  | -1.44418454 | -3.55109049 |
| H | 3.56132237  | -1.68376640 | -4.56250873 |
| H | 4.06275199  | -1.04152885 | -2.98708777 |
| H | 2.46384567  | -0.65837273 | -3.62093673 |
| O | -4.59066440 | -0.69850011 | -0.59282008 |
| S | -3.93114673 | -1.79401305 | -1.47045825 |
| C | -4.61213426 | -3.34343908 | -0.78475861 |
| C | -4.09829687 | -4.56970900 | -1.20683384 |
| H | -3.25608621 | -4.59977294 | -1.88887318 |
| C | -4.65460387 | -5.74606163 | -0.71318049 |
| H | -4.25439140 | -6.70282733 | -1.02923011 |
| C | -5.71555171 | -5.69575169 | 0.19440229  |
| H | -6.14232199 | -6.61489458 | 0.57970906  |
| C | -6.22114908 | -4.46465399 | 0.60589772  |
| H | -7.04168603 | -4.42204816 | 1.31381676  |
| C | -5.67331114 | -3.28010046 | 0.11071023  |
| H | -6.04382766 | -2.31143689 | 0.41700382  |
| O | 5.96502772  | -2.12578619 | -0.83119376 |
| C | 8.25208543  | -2.70967487 | -0.48559017 |
| H | 8.86182764  | -3.46386594 | -0.98722674 |
| H | 8.70563309  | -2.51479400 | 0.48776021  |
| C | 6.78848329  | -3.19192734 | -0.34133976 |
| H | 6.60733147  | -4.09458206 | -0.93913931 |
| H | 6.48730010  | -3.37581375 | 0.68935503  |
| C | 8.13995156  | -1.41183126 | -1.32558129 |
| H | 8.26780988  | -0.53209646 | -0.69186866 |
| H | 8.87970648  | -1.35982127 | -2.12660572 |
| C | 6.70573966  | -1.45735940 | -1.85969895 |
| H | 6.24526967  | -0.48047463 | -1.99789357 |
| H | 6.64236290  | -2.03285191 | -2.79441257 |
| O | 5.61997393  | -1.41840335 | 2.08612596  |
| H | 6.26620482  | 0.03180651  | 0.79482078  |
| C | 6.49735669  | -0.31862220 | 1.79771256  |
| H | 7.54190009  | -0.66300914 | 1.83668058  |
| C | 6.20256274  | 0.69152175  | 2.90687569  |
| H | 7.03360698  | 1.37777778  | 3.08262664  |
| C | 5.89403092  | -0.21012534 | 4.12901087  |
| H | 6.71877879  | -0.22014114 | 4.84465546  |
| H | 6.53685723  | -2.27400615 | 3.73631155  |
| H | 5.32636851  | 1.28148691  | 2.63153796  |
| H | 4.76973400  | -2.10332403 | 3.81961902  |
| C | 5.69035610  | -1.61310151 | 3.50571127  |
| H | 5.00014813  | 0.12705889  | 4.65511244  |
| N | -1.66424532 | 1.50535063  | 1.08949478  |
| N | -2.27065046 | 2.38740014  | -1.41152764 |

**Compound [Na(Ph(O)S-ATl<sup>Pr/Pr</sup>)(thf)<sub>2</sub>]<sub>2</sub>**

|   |             |             |             |
|---|-------------|-------------|-------------|
| N | 1.67310639  | -1.55418418 | 1.04340676  |
| N | 2.25842530  | -2.38420609 | -1.47908064 |
| C | 0.70158583  | -1.94559865 | 0.27727500  |
| C | 1.02319754  | -2.07582650 | -1.20314648 |
| C | 0.02310485  | -1.78823623 | -2.20677643 |
| H | 0.43169415  | -1.55124743 | -3.18011459 |
| C | -1.34521987 | -1.69966894 | -2.14508821 |
| H | -1.82529562 | -1.40315559 | -3.07461313 |
| C | -2.21943671 | -1.98775196 | -1.08198788 |
| C | -1.83563736 | -2.37439875 | 0.21646082  |
| H | -2.64201412 | -2.69401872 | 0.87218852  |
| C | -0.59009696 | -2.37944030 | 0.78330483  |
| H | -0.57099687 | -2.72400077 | 1.80944606  |
| C | 1.47454727  | -1.41129787 | 2.48570690  |
| H | 0.42813417  | -1.18742334 | 2.72739579  |
| C | 1.87205478  | -2.71903773 | 3.18960091  |
| H | 1.79384673  | -2.62022897 | 4.27705987  |
| H | 2.90373814  | -2.98013394 | 2.93694698  |
| H | 1.23855339  | -3.55048929 | 2.87164173  |
| C | 2.32133824  | -0.23673170 | 2.98582715  |
| H | 2.20729125  | -0.10794912 | 4.06710856  |
| H | 2.01878157  | 0.68457126  | 2.48905601  |
| H | 3.37684019  | -0.40410589 | 2.76486557  |
| C | 2.65231536  | -2.69176954 | -2.85384865 |
| H | 1.79474404  | -3.05504658 | -3.43792664 |
| C | 3.69173021  | -3.81947877 | -2.81830992 |
| H | 3.99583719  | -4.09853893 | -3.83256240 |
| H | 3.27665257  | -4.70288774 | -2.32644086 |



|   |             |             |             |                                                                    |             |             |             |
|---|-------------|-------------|-------------|--------------------------------------------------------------------|-------------|-------------|-------------|
| C | -0.69909918 | 1.91006877  | 0.32213583  | H                                                                  | -8.26567222 | 3.81569591  | -1.66339276 |
| C | -1.03466572 | 2.06871336  | -1.15237887 | H                                                                  | -8.94222808 | 3.35032233  | -0.09953479 |
| C | -0.04514544 | 1.79328326  | -2.17040921 | C                                                                  | -6.74834282 | 3.25547364  | -0.20384513 |
| H | -0.46426045 | 1.56716571  | -3.14188990 | H                                                                  | -6.26951398 | 4.20933205  | -0.44646110 |
| C | 1.32389188  | 1.71084910  | -2.12565527 | C                                                                  | -8.17925212 | 1.67397855  | -1.32039222 |
| H | 1.79482562  | 1.43111949  | -3.06500814 | H                                                                  | -8.43238215 | 0.98931193  | -0.50613008 |
| C | 2.20899468  | 1.98604448  | -1.06765000 | H                                                                  | -8.88496470 | 1.51311046  | -2.13765694 |
| C | 1.83770271  | 2.34261477  | 0.24303184  | C                                                                  | -6.72808993 | 1.46768967  | -1.74182644 |
| H | 2.64991080  | 2.65085191  | 0.89698660  | H                                                                  | -6.38450673 | 0.43370827  | -1.72607614 |
| C | 0.59838900  | 2.33136258  | 0.82370930  | H                                                                  | -6.53924568 | 1.89674622  | -2.73543897 |
| H | 0.59035738  | 2.65265501  | 1.85753714  | H                                                                  | -6.74844611 | 3.12701471  | 0.88094129  |
| C | -1.45177369 | 1.33060741  | 2.52626437  | O                                                                  | -5.58441989 | 1.34139211  | 2.14492290  |
| H | -0.40294811 | 1.10203941  | 2.75288041  | H                                                                  | -6.28270330 | -0.05881621 | 0.82494591  |
| C | -1.84176106 | 2.62275435  | 3.26242463  | C                                                                  | -6.49963835 | 0.27940903  | 1.83524956  |
| H | -1.75378247 | 2.50003472  | 4.34670379  | H                                                                  | -7.53163685 | 0.65948313  | 1.88514337  |
| H | -2.87525498 | 2.89082781  | 3.02501856  | C                                                                  | -6.23691793 | -0.76383359 | 2.92210485  |
| H | -1.21002011 | 3.46028261  | 2.95705033  | H                                                                  | -7.09177843 | -1.42262475 | 3.08845528  |
| C | -2.29238895 | 0.14405741  | 3.00892848  | C                                                                  | -5.88790998 | 0.09971188  | 4.16123684  |
| H | -2.17126259 | -0.00468626 | 4.08692009  | H                                                                  | -6.70239563 | 0.11663712  | 4.88837341  |
| H | -1.98931149 | -0.76648123 | 2.49317987  | H                                                                  | -6.48151450 | 2.18566310  | 3.81163270  |
| H | -3.34984502 | 0.31023599  | 2.79654433  | H                                                                  | -5.38410768 | -1.37900861 | 2.62931602  |
| C | -2.67604735 | 2.71628418  | -2.77810630 | H                                                                  | -4.71904201 | 1.97191215  | 3.89161898  |
| H | -1.82096687 | 3.07626096  | -3.36765306 | C                                                                  | -5.65051466 | 1.50977702  | 3.56796921  |
| C | -3.70195608 | 3.85537413  | -2.71922288 | H                                                                  | -4.99717918 | -0.27526654 | 4.66677577  |
| H | -4.00748027 | 4.15335287  | -3.72770685 | Na                                                                 | 3.85670625  | -1.36329498 | 0.05318246  |
| H | -3.27319459 | 4.72631540  | -2.21684887 | Na                                                                 | -3.86350130 | 1.35551809  | 0.12201772  |
| H | -4.58572847 | 3.53869046  | -2.16178202 |                                                                    |             |             |             |
| C | -3.26357729 | 1.48266344  | -3.48219495 | <b>Compound [K(Ph(O)S-ATI<sup>IPr</sup>/IPr)(thf)<sub>4</sub>]</b> |             |             |             |
| H | -3.61736024 | 1.73747562  | -4.48626018 | K                                                                  | 1.99706608  | 0.14456444  | -0.25790547 |
| H | -4.10473395 | 1.08111796  | -2.91196590 | N                                                                  | -0.18973447 | -0.72126640 | 1.20609752  |
| H | -2.51786332 | 0.69061459  | -3.57122750 | N                                                                  | -0.14621251 | -1.08844959 | -1.54183328 |
| O | 4.59079398  | 0.68793475  | -0.65076153 | C                                                                  | -1.23781271 | -1.19858351 | 0.58983051  |
| S | 3.91681560  | 1.81085476  | -1.48192218 | C                                                                  | -1.28892174 | -0.99424661 | -0.91454282 |
| C | 4.60060816  | 3.33861083  | -0.75269660 | C                                                                  | -2.53321741 | -0.62067788 | -1.54957169 |
| C | 4.08828029  | 4.57713022  | -1.13932734 | H                                                                  | -2.41474612 | -0.10200428 | -2.49367121 |
| H | 3.24677906  | 4.62795078  | -1.82102243 | C                                                                  | -3.84186150 | -0.80470052 | -1.16606080 |
| C | 4.64542017  | 5.73799925  | -0.61123663 | H                                                                  | -4.59199110 | -0.39646587 | -1.84011921 |
| H | 4.24667191  | 6.70401136  | -0.89981521 | C                                                                  | -4.34668897 | -1.52007647 | -0.07499966 |
| C | 5.70552983  | 5.66012785  | 0.29543624  | C                                                                  | -3.60192241 | -2.13705836 | 0.93380105  |
| H | 6.13303043  | 6.56721968  | 0.70755598  | H                                                                  | -4.16387057 | -2.76913612 | 1.61974852  |
| C | 6.20942733  | 4.41704382  | 0.67139658  | C                                                                  | -2.25798434 | -2.00460319 | 1.22197999  |
| H | 7.02937351  | 4.35298841  | 1.37838426  | H                                                                  | -1.92789119 | -2.55502514 | 2.09484107  |
| C | 5.66083457  | 3.24798575  | 0.14145338  | C                                                                  | -0.06135240 | -0.88532508 | 2.65205900  |
| H | 6.03022489  | 2.27029750  | 0.41899673  | H                                                                  | -1.04250854 | -0.98420394 | 3.13796804  |
| O | -5.95908590 | 2.17968223  | -0.75568121 | C                                                                  | 0.76323290  | -2.14493705 | 2.96394506  |
| C | -8.15316680 | 3.12832593  | -0.82037256 |                                                                    |             |             |             |

|   |             |             |             |
|---|-------------|-------------|-------------|
| H | 0.88412253  | -2.28741993 | 4.04271609  |
| H | 1.75729150  | -2.05890327 | 2.51406024  |
| H | 0.28801322  | -3.03682738 | 2.54923121  |
| C | 0.61896880  | 0.35668344  | 3.24269638  |
| H | 0.77009716  | 0.24216501  | 4.32094941  |
| H | 0.01156610  | 1.24980478  | 3.07974340  |
| H | 1.59365500  | 0.52128017  | 2.77531476  |
| C | -0.11864338 | -1.06806780 | -3.00532031 |
| H | -1.08476895 | -1.38171681 | -3.42471812 |
| C | 0.93337374  | -2.07562202 | -3.48673313 |
| H | 0.98398020  | -2.09398857 | -4.57995240 |
| H | 0.68868570  | -3.08089370 | -3.13603438 |
| H | 1.92367312  | -1.81544007 | -3.10139017 |
| C | 0.20482346  | 0.33769198  | -3.54156318 |
| H | 0.19002763  | 0.34691174  | -4.63611040 |
| H | 1.20112324  | 0.65689050  | -3.22004934 |
| H | -0.52037554 | 1.07355066  | -3.18733125 |
| O | -6.75432585 | -1.90107515 | -1.30526946 |
| S | -6.13333265 | -1.67756363 | 0.06651410  |
| C | -6.49949282 | 0.08264569  | 0.45673864  |
| C | -5.96218942 | 0.68159598  | 1.59566156  |
| H | -5.28548849 | 0.12559899  | 2.23567471  |
| C | -6.27972683 | 2.00615003  | 1.88301978  |
| H | -5.86294355 | 2.48131935  | 2.76454937  |
| C | -7.12892244 | 2.72346084  | 1.03605814  |
| H | -7.37427092 | 3.75526374  | 1.26250729  |
| C | -7.66034133 | 2.11190167  | -0.09772854 |
| H | -8.31939493 | 2.66745012  | -0.75620711 |
| C | -7.35167992 | 0.78160541  | -0.38955320 |
| H | -7.74876833 | 0.27718806  | -1.26336106 |
| C | -0.51350372 | 3.83059025  | -1.78598375 |
| H | -0.75683332 | 3.65491937  | -2.83516419 |
| H | -0.72679138 | 4.87978022  | -1.56498147 |
| C | 0.96145788  | 3.50228949  | -1.47374513 |
| H | 1.42751979  | 2.88802004  | -2.24777552 |
| H | 1.56391181  | 4.40770756  | -1.33808491 |
| O | 0.97379026  | 2.73724556  | -0.24762157 |
| C | -1.29631661 | 2.91096054  | -0.83217046 |
| H | -2.26822203 | 3.31705877  | -0.54686266 |
| H | -1.46081041 | 1.92625210  | -1.27170516 |
| C | -0.34070762 | 2.78377515  | 0.34716537  |
| H | -0.40860311 | 3.65021698  | 1.02055620  |
| H | -0.47560999 | 1.86421355  | 0.91586772  |
| O | 3.66229919  | 1.09570582  | -2.31503847 |
| C | 5.90875194  | 0.28458338  | -2.11504447 |
| H | 6.70268175  | 0.41278393  | -2.85374879 |

|   |            |             |             |
|---|------------|-------------|-------------|
| H | 6.17746730 | -0.56456663 | -1.48510594 |
| C | 4.54235084 | 0.06800047  | -2.81289931 |
| H | 4.62683724 | 0.16402190  | -3.90153988 |
| H | 4.08613746 | -0.89243655 | -2.57318654 |
| C | 5.70281896 | 1.57255129  | -1.28231276 |
| H | 5.45086926 | 1.32555686  | -0.24897188 |
| H | 6.57822577 | 2.22506357  | -1.28468928 |
| C | 4.48648224 | 2.20937914  | -1.95522740 |
| H | 3.89928806 | 2.86063702  | -1.30618288 |
| H | 4.77160216 | 2.77329393  | -2.85564545 |
| O | 3.41537859 | -2.19214001 | -0.43900426 |
| C | 2.89416290 | -4.26520312 | 0.63686753  |
| H | 3.09233727 | -5.28044364 | 0.28802188  |
| H | 2.08045437 | -4.31592446 | 1.35985188  |
| C | 2.54100430 | -3.33904054 | -0.54971264 |
| H | 2.72869736 | -3.83242005 | -1.51036048 |
| H | 1.51808635 | -2.96132065 | -0.54769608 |
| C | 4.16052700 | -3.62393161 | 1.25804783  |
| H | 3.90362469 | -3.07129400 | 2.16472526  |
| H | 4.92731346 | -4.35637742 | 1.51733595  |
| C | 4.62226372 | -2.64972068 | 0.17173266  |
| H | 5.15706348 | -1.77621482 | 0.54931055  |
| H | 5.25351450 | -3.15553018 | -0.57448614 |
| O | 3.86488457 | 1.03448084  | 1.62402625  |
| H | 2.71629799 | 2.69506173  | 2.08762680  |
| C | 3.77396577 | 2.43331666  | 1.98978118  |
| H | 4.20063255 | 3.02824477  | 1.17869514  |
| C | 4.53402252 | 2.57588592  | 3.31080207  |
| H | 5.59125972 | 2.78674702  | 3.12442155  |
| C | 4.37076422 | 1.18070269  | 3.93354827  |
| H | 5.13605331 | 0.94553480  | 4.67515981  |
| H | 5.49156664 | 0.03959610  | 2.44883931  |
| H | 4.13295734 | 3.37589793  | 3.93504097  |
| H | 3.89195805 | -0.65357284 | 2.80709883  |
| C | 4.45058863 | 0.27919628  | 2.70248414  |
| H | 3.39013117 | 1.08563317  | 4.40636528  |

**Compound [K(Ph(O)S-ATl<sup>iPr</sup>/iPr)(thf)<sub>3</sub>]<sub>2</sub>**

|   |             |            |             |
|---|-------------|------------|-------------|
| K | -4.06792400 | 0.69953400 | -0.28951000 |
| N | -1.58855400 | 1.42030400 | 0.82743100  |
| N | -2.05764500 | 2.20115800 | -1.76176000 |
| C | -0.63601600 | 1.97874800 | 0.14657100  |
| C | -0.83583800 | 2.02964600 | -1.35950900 |
| C | 0.29002600  | 1.81469300 | -2.25327800 |
| H | 0.01976400  | 1.38981400 | -3.21194600 |

|   |             |             |             |   |             |             |             |
|---|-------------|-------------|-------------|---|-------------|-------------|-------------|
| C | 1.62358000  | 2.08735500  | -2.10477900 | H | -6.30664600 | 2.98271800  | -1.69761400 |
| H | 2.24171300  | 1.85443100  | -2.96917400 | C | -8.20647600 | 0.55679300  | -1.06189800 |
| C | 2.30460300  | 2.66911800  | -1.01398300 | H | -7.82466000 | 0.53690800  | -0.03939700 |
| C | 1.75018300  | 2.94691600  | 0.25059500  | H | -9.16636600 | 0.03647600  | -1.08898900 |
| H | 2.41114400  | 3.44613400  | 0.95476100  | C | -7.16793100 | -0.05225800 | -2.00096000 |
| C | 0.50558500  | 2.64969300  | 0.74422000  | H | -6.64611500 | -0.92294100 | -1.60296200 |
| H | 0.35277800  | 2.95960500  | 1.77054500  | H | -7.61144100 | -0.30338600 | -2.97646700 |
| C | -1.50378400 | 1.31421800  | 2.28270800  | O | -4.96091200 | 3.23085600  | 0.39209800  |
| H | -0.46330300 | 1.23930800  | 2.62522600  | C | -4.25488100 | 5.21515000  | 1.51641600  |
| C | -2.15106100 | 2.54748700  | 2.93419100  | H | -4.41205100 | 6.25808600  | 1.23342300  |
| H | -2.16676000 | 2.45573800  | 4.02500500  | H | -3.39230000 | 5.17931400  | 2.18216700  |
| H | -3.17868200 | 2.65300100  | 2.57747000  | C | -4.04333400 | 4.33316100  | 0.26256600  |
| H | -1.61655700 | 3.46389700  | 2.67338600  | H | -4.27905400 | 4.88582400  | -0.65498200 |
| C | -2.22615100 | 0.03594800  | 2.72173400  | H | -3.04709200 | 3.90558400  | 0.15907400  |
| H | -2.13283300 | -0.11354800 | 3.80231500  | C | -5.51446800 | 4.61517200  | 2.19261400  |
| H | -1.81350400 | -0.83286200 | 2.20897800  | H | -5.23261600 | 4.00416500  | 3.05312800  |
| H | -3.29095200 | 0.09049000  | 2.48091000  | H | -6.21850300 | 5.37582500  | 2.53612800  |
| C | -2.33814300 | 2.40485300  | -3.18306500 | C | -6.10064700 | 3.72228200  | 1.09559500  |
| H | -1.44623100 | 2.75953600  | -3.71854600 | H | -6.66092700 | 2.85920300  | 1.45475000  |
| C | -3.41066800 | 3.49271700  | -3.31164500 | H | -6.74052200 | 4.30591400  | 0.41484900  |
| H | -3.65897400 | 3.67098500  | -4.36281800 | O | -6.13589300 | 0.37686100  | 1.89098700  |
| H | -3.05780400 | 4.43102900  | -2.87617100 | H | -6.50856900 | -1.41571500 | 0.97176700  |
| H | -4.32025000 | 3.19432300  | -2.78745700 | C | -6.63985100 | -0.96774400 | 1.95428800  |
| C | -2.80479300 | 1.09610900  | -3.83937400 | H | -7.70707800 | -0.95155600 | 2.22404500  |
| H | -2.98039300 | 1.24312000  | -4.90983500 | C | -5.79730700 | -1.62051400 | 3.04621700  |
| H | -3.74313300 | 0.75216400  | -3.39334500 | H | -6.26453000 | -2.51166900 | 3.47068200  |
| H | -2.05413800 | 0.31299400  | -3.71649400 | C | -5.63480300 | -0.47779800 | 4.07457600  |
| O | 4.87130100  | 1.91564800  | -0.45524500 | H | -6.35466900 | -0.57521500 | 4.89037900  |
| S | 4.03416600  | 2.91188500  | -1.29751800 | H | -6.81791200 | 1.31838900  | 3.61346700  |
| C | 4.29164400  | 4.51416400  | -0.46593800 | H | -4.83228200 | -1.90579900 | 2.62241200  |
| C | 3.61537700  | 5.64586100  | -0.92136800 | H | -5.09276600 | 1.50914900  | 3.23962800  |
| H | 2.89792800  | 5.56163900  | -1.72995500 | C | -5.92153000 | 0.80090400  | 3.24682400  |
| C | 3.84952700  | 6.87115700  | -0.30464300 | H | -4.63572400 | -0.46272600 | 4.51101100  |
| H | 3.32291800  | 7.75463100  | -0.64771700 | K | 4.06792400  | -0.69953400 | -0.28951100 |
| C | 4.75241300  | 6.96215600  | 0.75791600  | N | 1.58855500  | -1.42030300 | 0.82743000  |
| H | 4.92940200  | 7.91840900  | 1.23721600  | N | 2.05764500  | -2.20115600 | -1.76176100 |
| C | 5.42334100  | 5.82442200  | 1.20071900  | C | 0.63601600  | -1.97874600 | 0.14657000  |
| H | 6.12273700  | 5.89226500  | 2.02684100  | C | 0.83583800  | -2.02964300 | -1.35950900 |
| C | 5.19904100  | 4.59238200  | 0.58378600  | C | -0.29002600 | -1.81469000 | -2.25327800 |
| H | 5.70388300  | 3.69153400  | 0.90765000  | H | -0.01976500 | -1.38981000 | -3.21194600 |
| O | -6.19717900 | 0.99438500  | -2.16011600 | C | -1.62358000 | -2.08735300 | -2.10477900 |
| C | -8.29195300 | 2.00952000  | -1.57346700 | H | -2.24171300 | -1.85442800 | -2.96917300 |
| H | -9.08994200 | 2.11451800  | -2.31273900 | C | -2.30460200 | -2.66911700 | -1.01398300 |
| H | -8.48897800 | 2.72039000  | -0.76904600 | C | -1.75018200 | -2.94691600 | 0.25059400  |
| C | -6.90816600 | 2.24492700  | -2.22850000 | H | -2.41114300 | -3.44613500 | 0.95476100  |
| H | -7.00332400 | 2.55154800  | -3.27673900 | C | -0.50558400 | -2.64969200 | 0.74422000  |

|   |             |             |             |
|---|-------------|-------------|-------------|
| H | -0.35277700 | -2.95960500 | 1.77054400  |
| C | 1.50378500  | -1.31421700 | 2.28270800  |
| H | 0.46330400  | -1.23930700 | 2.62522600  |
| C | 2.15106200  | -2.54748700 | 2.93418900  |
| H | 2.16676300  | -2.45573800 | 4.02500300  |
| H | 3.17868300  | -2.65300100 | 2.57746800  |
| H | 1.61655800  | -3.46389700 | 2.67338400  |
| C | 2.22615200  | -0.03594800 | 2.72173500  |
| H | 2.13283400  | 0.11354800  | 3.80231600  |
| H | 1.81350600  | 0.83286300  | 2.20897900  |
| H | 3.29095400  | -0.09049000 | 2.48091200  |
| C | 2.33814200  | -2.40484900 | -3.18306600 |
| H | 1.44623000  | -2.75953300 | -3.71854700 |
| C | 3.41066800  | -3.49271300 | -3.31164700 |
| H | 3.65897300  | -3.67098000 | -4.36282000 |
| H | 3.05780400  | -4.43102600 | -2.87617300 |
| H | 4.32024900  | -3.19432000 | -2.78746000 |
| C | 2.80479200  | -1.09610500 | -3.83937500 |
| H | 2.98039100  | -1.24311500 | -4.90983600 |
| H | 3.74313200  | -0.75216000 | -3.39334600 |
| H | 2.05413600  | -0.31299000 | -3.71649500 |
| O | -4.87130100 | -1.91564700 | -0.45524500 |
| S | -4.03416500 | -2.91188500 | -1.29751800 |
| C | -4.29164300 | -4.51416400 | -0.46593900 |
| C | -3.61537600 | -5.64586100 | -0.92136800 |
| H | -2.89792500 | -5.56163800 | -1.72995400 |
| C | -3.84952600 | -6.87115700 | -0.30464300 |
| H | -3.32291600 | -7.75463100 | -0.64771600 |
| C | -4.75241300 | -6.96215600 | 0.75791500  |
| H | -4.92940200 | -7.91840900 | 1.23721500  |
| C | -5.42334200 | -5.82442300 | 1.20071800  |
| H | -6.12273900 | -5.89226500 | 2.02683900  |
| C | -5.19904100 | -4.59238300 | 0.58378400  |
| H | -5.70388500 | -3.69153400 | 0.90764800  |
| O | 6.19718000  | -0.99438500 | -2.16011600 |
| C | 8.29195300  | -2.00952100 | -1.57346800 |
| H | 9.08994200  | -2.11451800 | -2.31274000 |
| H | 8.48897800  | -2.72039200 | -0.76904800 |
| C | 6.90816600  | -2.24492700 | -2.22850100 |
| H | 7.00332300  | -2.55154900 | -3.27674000 |
| H | 6.30664500  | -2.98271800 | -1.69761500 |
| C | 8.20647600  | -0.55679500 | -1.06189600 |
| H | 7.82466000  | -0.53691100 | -0.03939600 |
| H | 9.16636600  | -0.03647800 | -1.08898600 |
| C | 7.16793200  | 0.05225700  | -2.00095800 |

|   |            |             |             |
|---|------------|-------------|-------------|
| H | 6.64611700 | 0.92294000  | -1.60296000 |
| H | 7.61144300 | 0.30338600  | -2.97646500 |
| O | 4.96091000 | -3.23085700 | 0.39209700  |
| C | 4.25487700 | -5.21515200 | 1.51641300  |
| H | 4.41204600 | -6.25808800 | 1.23341800  |
| H | 3.39229600 | -5.17931600 | 2.18216300  |
| C | 4.04333100 | -4.33316100 | 0.26256300  |
| H | 4.27905200 | -4.88582400 | -0.65498500 |
| H | 3.04709000 | -3.90558300 | 0.15907000  |
| C | 5.51446500 | -4.61517600 | 2.19261100  |
| H | 5.23261300 | -4.00416900 | 3.05312600  |
| H | 6.21849900 | -5.37582900 | 2.53612500  |
| C | 6.10064500 | -3.72228400 | 1.09559300  |
| H | 6.66092600 | -2.85920700 | 1.45474900  |
| H | 6.74051900 | -4.30591600 | 0.41484700  |
| O | 6.13589300 | -0.37686200 | 1.89098700  |
| H | 6.50856700 | 1.41571400  | 0.97176900  |
| C | 6.63985100 | 0.96774200  | 1.95428900  |
| H | 7.70707800 | 0.95155300  | 2.22404400  |
| C | 5.79730900 | 1.62051100  | 3.04622000  |
| H | 6.26453300 | 2.51166500  | 3.47068500  |
| C | 5.63480600 | 0.47779400  | 4.07457800  |
| H | 6.35467400 | 0.57520900  | 4.89038000  |
| H | 6.81791400 | -1.31839300 | 3.61346500  |
| H | 4.83228300 | 1.90579700  | 2.62241700  |
| H | 5.09276700 | -1.50915300 | 3.23962800  |
| C | 5.92153100 | -0.80090700 | 3.24682300  |
| H | 4.63572800 | 0.46272200  | 4.51101400  |

## THF

|   |              |              |              |
|---|--------------|--------------|--------------|
| O | 0.000012879  | -1.252287366 | 0.000126355  |
| C | -0.732704867 | 0.994963493  | 0.230228160  |
| H | -0.790216163 | 1.147461406  | 1.312345189  |
| H | -1.342093846 | 1.759676387  | -0.255375746 |
| C | -1.168730098 | -0.427845916 | -0.133498106 |
| H | -1.949818721 | -0.823106551 | 0.521194753  |
| H | -1.527042311 | -0.478215519 | -1.170248101 |
| C | 0.732618067  | 0.995044229  | -0.230153891 |
| H | 0.790085239  | 1.147730689  | -1.312247117 |
| H | 1.341971998  | 1.759725357  | 0.255544298  |
| C | 1.168797394  | -0.427787423 | 0.133338453  |
| H | 1.949669202  | -0.822964890 | -0.521665475 |
| H | 1.527458598  | -0.478254234 | 1.169953662  |

## References

- 1 G. M. Sheldrick, *Acta Cryst. A*, 2015, **71**, 3–8.
- 2 G. M. Sheldrick, *Acta Cryst. C*, 2015, **71**, 3–8.
- 3 A. L. Spek, *Acta Cryst. C*, 2015, **71**, 9–18.
- 4 C. Lichtenberg, *Chem. Eur. J.*, 2020, **26**, 9674–9687.
- 5 A. Hanft and C. Lichtenberg, *Eur. J. Inorg. Chem.*, 2018, **2018**, 3361–3373.
- 6 A. Hanft, I. Krummenacher and C. Lichtenberg, *Chem. Eur. J.*, 2019, **25**, 11883–11891.
- 7 C. Lichtenberg and I. Krummenacher, *Chem. Commun.*, 2016, **52**, 10044–10047.
- 8 E. J. Cabrita and S. Berger, *Magn. Reson. Chem. (Magnetic Resonance in Chemistry)*, 2001, **39**, S142-S148.
- 9 Q. Jiang, H. Rügger and L. M. Venanzi, *Inorg. Chim. Acta*, 1999, **290**, 64–79.
- 10 S. Beck, A. Geyer and H.-H. Brintzinger, *Chem. Commun.*, 1999, 2477–2478.
- 11 A. Bondi, *J. Phys. Chem.*, 1964, **68**, 441–451.
- 12 D. Ben-Amotz and K. G. Willis, *J. Phys. Chem.*, 1993, **97**, 7736–7742.
- 13 M. J. Frisch, G. W. Trucks, H. B. Schlegel, G. E. Scuseria, M. A. Robb, J. R. Cheeseman, G. Scalmani, V. Barone, G. A. Petersson, H. Nakatsuji, X. Li, M. Caricato, A. V. Marenich, J. Bloino, B. G. Janesko, R. Gomperts, B. Mennucci, H. P. Hratchian, J. V. Ortiz, A. F. Izmaylov, J. L. Sonnenberg, Williams, F. Ding, F. Lipparini, F. Egidi, J. Goings, B. Peng, A. Petrone, T. Henderson, D. Ranasinghe, V. G. Zakrzewski, J. Gao, N. Rega, G. Zheng, W. Liang, M. Hada, M. Ehara, K. Toyota, R. Fukuda, J. Hasegawa, M. Ishida, T. Nakajima, Y. Honda, O. Kitao, H. Nakai, T. Vreven, K. Throssell, J. A. Montgomery Jr., J. E. Peralta, F. Ogliaro, M. J. Bearpark, J. J. Heyd, E. N. Brothers, K. N. Kudin, V. N. Staroverov, T. A. Keith, R. Kobayashi, J. Normand, K. Raghavachari, A. P. Rendell, J. C. Burant, S. S. Iyengar, J. Tomasi, M. Cossi, J. M. Millam, M. Klene, C. Adamo, R. Cammi, J. W. Ochterski, R. L. Martin, K. Morokuma, O. Farkas, J. B. Foresman and D. J. Fox, *Gaussian 16 Rev. A.03*, Wallingford, CT, 2016.
- 14 S. H. Vosko, L. Wilk and M. Nusair, *Can. J. Phys.*, 1980, **58**, 1200–1211.
- 15 C. Lee, W. Yang and R. G. Parr, *Phys. Rev. B*, 1988, **37**, 785–789.
- 16 A. D. Becke, *J. Chem. Phys.*, 1993, **98**, 5648–5652.
- 17 P. J. Stephens, F. J. Devlin, C. F. Chabalowski and M. J. Frisch, *J. Phys. Chem.*, 1994, **98**, 11623–11627.
- 18 R. Krishnan, J. S. Binkley, R. Seeger and J. A. Pople, *J. Chem. Phys.*, 1980, **72**, 650–654.
- 19 T. Clark, J. Chandrasekhar, G. W. Spitznagel and P. V. R. Schleyer, *J. Comput. Chem.*, 1983, **4**, 294–301.
- 20 S. Grimme, J. Antony, S. Ehrlich and H. Krieg, *J. Chem. Phys.*, 2010, **132**, 154104.
